1 **Title:** Comparative ‘omics analyses differentiate *Mycobacterium tuberculosis* and  
2 *Mycobacterium bovis* and reveal distinct macrophage responses to infection with the  
3 human and bovine tubercle bacilli

4 **Running title:** Host specificity and pathogenic mycobacteria

5  
6 Kerri M. Malone<sup>1#</sup>, Kévin Rue-Albrecht<sup>1,2,¥</sup>, David A. Magee<sup>2</sup>, Kevin Conlon<sup>1</sup>, Olga T.  
7 Schubert<sup>3,¶</sup>, Nicolas C. Nalpas<sup>2§</sup>, John A. Browne<sup>2</sup>, Alicia Smyth<sup>1</sup>, Eamonn Gormley<sup>4</sup>,  
8 Ruedi Aebersold<sup>3,5</sup>, David E. MacHugh<sup>2,6</sup> Stephen V. Gordon<sup>1,6,7,8,#</sup>

9  
10 <sup>1</sup>UCD School of Veterinary Medicine, University College Dublin, Belfield, Dublin 4,  
11 Ireland

12 <sup>2</sup>Animal Genomics Laboratory, UCD School of Agriculture and Food Science, University  
13 College Dublin, Belfield, Dublin 4, Ireland

14 <sup>3</sup>Department of Biology, Institute of Molecular Systems Biology, ETH Zurich, CH-8093,  
15 Switzerland

16 <sup>4</sup>Tuberculosis Diagnostics and Immunology Research Centre, UCD School of Veterinary  
17 Medicine, University College Dublin, Belfield, Dublin 4, Ireland

18 <sup>5</sup>Faculty of Science, University of Zurich, Zurich, Switzerland

19 <sup>6</sup>UCD Conway Institute of Biomolecular and Biomedical Research, University College  
20 Dublin, Belfield, Dublin 4, Ireland

21 <sup>7</sup>UCD School of Medicine, University College Dublin, Dublin 4, Ireland

22 <sup>8</sup>UCD School of Biomolecular and Biomedical Science, University College Dublin, Dublin  
23 4, Ireland

24

25 Current address: <sup>¥</sup>Kennedy Institute of Rheumatology, Nuffield Department of  
26 Orthopaedics, Rheumatology and Musculoskeletal Sciences, University of Oxford,  
27 Headington, Oxford OX3 7FY, UK; <sup>¶</sup>Department of Human Genetics, University of  
28 California, Los Angeles, USA; <sup>§</sup>Quantitative Proteomics and Proteome Centre Tübingen,  
29 Interfaculty Institute for Cell Biology, University of Tübingen, Tübingen, 72076, Germany

30

31 #Correspondence: Kerri M. Malone, Email: [kerri.malone@ucdconnect.ie](mailto:kerri.malone@ucdconnect.ie); Stephen V.  
32 Gordon, Email: [stephen.gordon@ucd.ie](mailto:stephen.gordon@ucd.ie)

33

34 **Abstract word count:** 226/250

35 **Main text word count:** 4,747/5,000

36

37

38

39

40

41

42

43

44

45 **Abstract:**

46 Members of the *Mycobacterium tuberculosis* complex (MTBC) are the causative  
47 agents of tuberculosis in a range of mammals, including humans. A key feature of MTBC  
48 pathogens is their high degree of genetic identity, yet distinct host tropism. Notably,  
49 while *Mycobacterium bovis* is highly virulent and pathogenic for cattle, the human  
50 pathogen *M. tuberculosis* is attenuated in cattle. Previous research also suggests that  
51 host preference amongst MTBC members has a basis in host innate immune responses.  
52 To explore MTBC host tropism, we present in-depth profiling of the MTBC reference  
53 strains *M. bovis* AF2122/97 and *M. tuberculosis* H37Rv at both the global transcriptional  
54 and translational level via RNA-sequencing and SWATH mass spectrometry.  
55 Furthermore, a bovine alveolar macrophage infection time course model was employed  
56 to investigate the shared and divergent host transcriptomic response to infection with  
57 *M. tuberculosis* or *M. bovis*. Significant differential expression of virulence-associated  
58 pathways between the two bacilli was revealed, including the ESX-1 secretion system. A  
59 divergent transcriptional response was observed between *M. tuberculosis* and *M. bovis*  
60 infection of bovine alveolar macrophages, in particular cytosolic DNA-sensing pathways  
61 at 48 hours post-infection, and highlights a distinct engagement of *M. bovis* with the  
62 bovine innate immune system. The work presented here therefore provides a basis for  
63 the identification of host innate immune mechanisms subverted by virulent host-  
64 adapted mycobacteria to promote their survival during the early stages of infection.

65 **Importance:**

66 The *Mycobacterium tuberculosis* complex (MTBC) includes the most important global  
67 pathogens for humans and animals, namely *Mycobacterium tuberculosis* and  
68 *Mycobacterium bovis*, respectively. These two exemplar mycobacterial pathogens share  
69 a high degree of genetic identity, but the molecular basis for their distinct host  
70 preference is unknown. In this work we integrated transcriptomic and proteomic  
71 analyses of the pathogens to elucidate global quantitative differences between them at  
72 the mRNA and protein level. We then integrated this data with transcriptome analysis  
73 of the bovine macrophage response to infection with either pathogen. Increased  
74 expression of the ESX-1 virulence system in *M. bovis* appeared a key driver of an  
75 increased cytosolic nucleic acid sensing and interferon response in bovine macrophages  
76 infected with *M. bovis* compared to *M. tuberculosis*. Our work demonstrates the  
77 specificity of host-pathogen interaction and how the subtle interplay between  
78 mycobacterial phenotype and host response may underpin host specificity amongst  
79 MTBC members.

80

81 **Keywords:** *Mycobacterium tuberculosis*, *Mycobacterium bovis*, cattle, gene expression,  
82 RNA-sequencing, SWATH mass spectrometry, transcriptomics, proteomics, host  
83 specificity, host-pathogen interactions, MTBC, infectious disease

## 84 **Introduction**

85           The *Mycobacterium tuberculosis* complex (MTBC) comprises ten mycobacterial  
86 species that cause tuberculosis (TB) in a broad range of mammalian species, including  
87 humans (1-4). Typically, MTBC species show greater than 99% nucleotide sequence  
88 identity and yet exhibit distinct host preference, indicating that this low-level of genetic  
89 divergence holds major implications for host-pathogen interactions (1-3). Divergence in  
90 host tropism is illustrated through the comparison of the human adapted  
91 *Mycobacterium tuberculosis* with the animal bacillus *Mycobacterium bovis*. *M.*  
92 *tuberculosis* is a highly successful pathogen and is the world's leading cause of death  
93 from an infectious agent with 1.7 million deaths reported in 2016 (5). *M. bovis*  
94 predominantly causes disease in cattle and bovine TB exacts a tremendous economic  
95 burden through production loss and control costs (6-8). *M. tuberculosis* appears unable  
96 to sustain (i.e., through cycles of infection, disease and transmission) in non-human  
97 animal populations, a fact that has been confirmed using an experimental bovine  
98 infection model (1, 9): while cattle infected with *M. bovis* display characteristic  
99 pathology, cattle infected with *M. tuberculosis* show minimal pathology despite positive  
100 skin-test and interferon-gamma responses indicative of successful infection. Conversely,  
101 while *M. bovis* can both infect humans and cause pulmonary disease that is clinically  
102 indistinguishable from *M. tuberculosis*, it rarely transmits among immunocompetent  
103 hosts (10, 11).

104           On a cellular level, the alveolar macrophage is the frontline host immune cell that  
105           encounters both *M. tuberculosis* and *M. bovis*, and its role during early stage infection is  
106           well established (12-18). Several studies have highlighted significant differences in the  
107           production of key innate factors, chemokines and cytokines at both the transcript and  
108           protein level in macrophages infected with *M. tuberculosis* or *M. bovis* (15-20).  
109           However, these studies evaluated only a subset of the innate response in macrophages  
110           and differences in the global transcript and protein response to infection with  
111           *M. tuberculosis* or *M. bovis* remains unknown. The central role of the alveolar  
112           macrophage during infection is also reflected in the fact that pathogenic mycobacteria  
113           have evolved several immune-evasion strategies to circumvent the killing mechanisms  
114           of the macrophage, including inhibition of phagosomal maturation, phagosomal escape  
115           and suppression of innate immune signalling (12-18). This facilitates the dissemination  
116           of the bacilli to other macrophages and ultimately throughout the host, with the  
117           concomitant development of immunopathology. Transmission of infection then occurs  
118           through the rupture of lesions into associated airways and the dispersal of bacilli  
119           (17,18). Thus, it can be hypothesized that the initial interaction between host and  
120           pathogen may be key for the host preference observed between *M. tuberculosis* and *M.*  
121           *bovis*; whether this interaction has roots in host-centric or pathogen-centric processes,  
122           or indeed a combination of both, has yet to be fully elucidated.

123           *M. tuberculosis* H37Rv and *M. bovis* AF2122/97 were the first MTBC genomes to  
124           be fully sequenced and they represent the default reference strains for the human and  
125           animal tubercle bacilli (2, 21, 22). It is hypothesized that host tropism between these

126 two species may be explained by differential gene expression profiles as a result of low  
127 genetic divergence (2, 21, 22). So far, functional studies have revealed that genetic  
128 changes between the two pathogens are responsible for differential nitrate reductase  
129 activity, for the loss of phenolic glycolipid production in *M. tuberculosis* H37Rv in  
130 contrast to *M. bovis*, and for differences in the PhoPR regulation system that governs  
131 the expression of virulence-related pathways such as EsxA/ESAT-6 secretion and cell  
132 wall lipid biosynthesis (23-26). While these studies highlight important differences  
133 between the two pathogens, host tropism likely involves a combination of events such  
134 as these that affect the expression and regulation of multiple virulence associated  
135 factors and/or the transcriptional regulators that govern their activity. In 2007, two  
136 microarray-based studies highlighted genes encoding the major antigens MPT83 and  
137 MPT70 that were expressed at higher levels in *M. bovis* and genes involved in SL-1  
138 production that were expressed at a higher level in *M. tuberculosis* (27, 28). Since these  
139 reports, investigations into species-specific expression profiles of the two pathogens  
140 have been lacking at the global transcriptional level and have yet to be defined at the  
141 proteomic level. Definition of the differential “expressome” between *M. tuberculosis*  
142 and *M. bovis* will shed light on how alternate expression of two highly related genomes  
143 impacts on the ultimate success of these pathogens and host specificity within the  
144 MTBC.

145

146 As a route to defining host preference between *M. tuberculosis* and *M. bovis*, we  
147 have conducted in-depth profiling of *M. bovis* AF2122/97 and *M. tuberculosis* H37Rv at

148 both the global transcriptional and translational level *in vitro* using RNA-seq and  
149 Sequential Window Acquisition of all Theoretical Spectra (SWATH) mass spectrometry, a  
150 massively parallel targeting mass spectrometry that provides highly reproducible  
151 quantitative measurements across samples (29). To address how MTBC pathogen  
152 variation impacts on the host innate response, we have performed detailed comparative  
153 transcriptomic analyses of the bovine alveolar macrophage response to infection with  
154 both pathogens using RNA-sequencing (RNA-seq). Through these analyses, we reveal  
155 significant differential expression of virulence-associated pathways between *M.*  
156 *tuberculosis* and *M. bovis* was found, in particular the ESX-1 secretion system, while the  
157 macrophage infection study highlights a distinct engagement of *M. bovis* with the  
158 bovine innate immune system was found, in particular with the cytosolic DNA-sensing  
159 pathways of the macrophage.

160



161 **Methods**

162 **Mycobacterial culture for pathogen transcriptomics and proteomics**

163 Exponentially grown mycobacterial liquid cultures were established in Sauton's basal  
164 media +0.025% tyloxapol. For mid to late-log phase culture, mycobacterial cells were  
165 grown to an optical density (OD<sub>600nm</sub>) of 0.6 – 0.8 at 37°C prior to harvest. For the  
166 current study, six *M. bovis* AF2122/97 and six *M. tuberculosis* H37Rv replicates were  
167 prepared. Matched RNA and protein samples were harvested and prepared for strand-  
168 specific RNA-sequencing or SWATH mass spectrometry.

169 **RNA extraction, RNA-seq library preparation and high-throughput sequencing for *M.***

170 ***bovis* and *M. tuberculosis***

171 Mycobacterial cells were harvested by centrifugation at 2,500 × g for 10 min and the  
172 pellet was re-suspended in 1 ml of TRIzol® (Life Technologies). The suspension was  
173 transferred to a 2 ml screw cap tube and the cells were lysed by bead-beating for 30 s at  
174 maximum setting using 1 mm glass beads (Sigma) on a MagNaWLyser instrument  
175 (Roche). Samples were placed at 80°C immediately and thawed before use. 20% v/v  
176 chloroform was added, the sample were shaken vigorously for 15 s and incubated for 2-  
177 3 min at room temperature. The samples were centrifuged at 12,000 × g for 15 min at  
178 4°C and the top phase was added to the DNA-free columns from the RNeasy plus kit  
179 (Qiagen). The sample were processed as per the manufacturer's guidelines with the  
180 following exceptions: 1.5 volumes of 100% ethanol was added to sample prior to its  
181 application to the RNeasy column in order to recover all RNA species. RNA was eluted in

182 molecular grade water and its concentration was determined using the NanoDrop  
183 spectrophotometer (NDW1000) prior to DNase treatment. A DNase treatment using  
184 TURBO DNase kit (Thermo Fisher Scientific) was performed by following the vigorous  
185 DNase treatment as per manufacturer's guidelines; 7  $\mu$ l of DNase buffer + 1  $\mu$ l enzyme  
186 at 37°C for 30 min followed by a further 1  $\mu$ l of enzyme and incubation at 37°C for 30  
187 min. A DNase stopping solution was not added to the samples as they were column-  
188 purified and concentrated using the RNA Clean and Concentrator kit according to  
189 manufacturer's guidelines (Zymo). RNA was eluted in molecular grade water and its  
190 concentration was determined using the NanoDrop spectrophotometer (NDW1000).  
191 RNA integrity number (RIN) values were assessed for each RNA sample being considered  
192 for RNA-sequencing using the 2100 Bioanalyser (Agilent) and the RNA 6000 Nano kit  
193 (Agilent) according to manufacturer's guidelines. RIN values are calculated by assessing  
194 the entire electrophoretic trace of an RNA sample, along with the 23S/16S rRNA  
195 intensity value. Only samples with a RIN value > 8 were selected for further analysis by  
196 RNA-sequencing. Sequencing libraries were prepared at the Genomics Core, Michigan  
197 State University, Michigan, USA using the Illumina Truseq Stranded Total RNA Library  
198 Prep Kit LT and the Epicenter RiboWZero Magnetic Bacteria kit to deplete ribosomal  
199 RNA. Single-end, strand-specific 50 bp read data was produced with base calling  
200 performed by Illumina Real Time Analysis (RTA) v1.18.64.

201 **Differential gene expression analysis of *M. bovis* and *M. tuberculosis* RNA-sequencing**  
202 **data**

203 Computational analyses were performed on a 32-node Compute Server with Linux

204 Ubuntu [version 12.04.2]. Briefly, adapter sequence contamination and paired-end  
205 reads of poor quality were removed from the raw data. At each step, read quality was  
206 assessed with FastQC [version 0.10.1] (30). Single-end reads were aligned to the *M.*  
207 *bovis* AF2122/97 or *M. tuberculosis* H37Rv reference genomes with the aligner Stampy  
208 in hybrid mode with BWA (31). Read counts for each gene were calculated using  
209 featureCounts, set to unambiguously assign uniquely aligned single-end reads in a  
210 stranded manner to gene exon annotation (32).

211       Prior to cross-species differential expression analysis, an Identical/Variable gene  
212 dataset was constructed for *M. tuberculosis* H37Rv and *M. bovis* AF2122/97 where  
213 orthologous genes were separated into those genes whose protein products are of  
214 equal length and 100% conserved at the amino acid level (Identical,  $n = 2,775$ ) from  
215 those that are not (Variable,  $n = 1,224$ ). (Fig.1A, Supp\_I.xlsx). Among the Variable genes  
216 are examples of truncated genes, genes that have been split into two or more as a result  
217 of in-frame sequence variance (leading to some genes being represented in more than  
218 one Variable gene pair), or genes that differ by a non-synonymous SNP resulting in an  
219 amino acid change at the protein level. Negative binomial modelling tools such as  
220 DESeq2 that was used in this instance assume equal feature lengths when calculating  
221 differential expression (DE) of a gene, or in this case between orthologous genes of two  
222 species in a given condition (33). For those annotations whose gene lengths are not  
223 equal, such as in the case of truncated/elongated/frameshift instances found in the *M.*  
224 *bovis* AF2122/97 genome with respect to *M. tuberculosis* H37Rv, analysis with DESeq2  
225 would result in erroneous differential expression results; thus a separate differential

226 expression analyses was carried out for Variable genes using Transcript per Million  
227 (TPM) values that are normalised for feature length (33, 34). Differential gene  
228 expression analysis for those genes of equal lengths was performed using the DESeq2  
229 pipeline, correcting for multiple testing using the Benjamini-Hochberg method (33). All  
230 further reference to differentially expressed genes between the two mycobacterial  
231 species will be with regards to a gene being expressed at a higher level in one species  
232 with respect to the other, and hence if a gene is upregulated in *M. bovis* it is  
233 downregulated or expressed at a lower level in *M. tuberculosis* and vice versa ( $\log_2$  fold  
234 change ( $\text{Log}_2\text{FC} > 1$  and  $< -1$ ), false discovery rate (FDR) threshold of significance  $< 0.05$ ).

### 235 **Transcription factor enrichment analysis**

236 Data relating to the shift in the transcriptional landscape of *M. tuberculosis* upon  
237 overexpression of 183 transcription factors was used to perform a formal transcription  
238 factor enrichment analysis (35-37). The data represents 9,335 regulatory events and  
239 provides regulatory evidence for over 70% of the annotated genes in the *M. tuberculosis*  
240 genome ( $\text{FC} > 2$ ,  $P < 0.01$ ) (35-37). This data was analysed alongside the DE genes  
241 identified in this study between *M. bovis* and *M. tuberculosis*. Only genes and  
242 transcription factors that are 100% identical in sequence and length between the two  
243 species were considered for this analysis. Over-representation of a transcription factor  
244 with a given set of differentially expressed genes was assessed by gene-regulon  
245 association and calculation of the Rand Index ( $\text{Log}_2\text{FC} > 1$  and  $P < 0.05$  for a given DE  
246 gene).

247

248 **Protein extraction and SWATH mass spectrometry for *M. bovis* and *M. tuberculosis***

249 Mycobacterial cells were harvested by centrifugation at  $2,500 \times g$  for 10 min and the  
250 pellet was re-suspended in 1 ml LB buffer (0.1 M ammonium bicarbonate buffer, 8 M  
251 urea, 0.1% RapiGEST SF (Waters, UK)). The suspension was transferred to a 2-ml screw  
252 cap tube and the cells were lysed by bead-beating for 30 s at maximum setting using 3  
253 mm glass beads (Sigma) and a MagNalyser instrument (Roche). The lysate supernatant  
254 was harvested by centrifugation at  $12,000 \times g$  for 10 min and transferred to a clean 1 ml  
255 tube. The remaining pellet was re-suspended in LB buffer and the bead beating cycle  
256 was repeated twice more. Protein lysate samples were stored at  $-80^{\circ}\text{C}$ . Protein samples  
257 were removed from  $-80^{\circ}\text{C}$  storage and thawed on ice. Total protein content was  
258 measured using the Qubit Protein Assay kit according to manufacturer's guidelines and  
259 protein concentrations were adjusted to 0.5 mg/ml. Protein disulphide bonds were  
260 reduced by addition of 0.2 M Tris(2-carboxyethyl)phosphine (TCEP) and the resulting  
261 free cysteine residues were alkylated by addition of 0.4 M iodoacetamide (IAA).  
262 Extracted protein samples were diluted with 0.1 M ammonium bicarbonate buffer to  
263 reach a urea concentration of  $< 2 \text{ M}$  and then digested with 1:50 enzyme/substrate ratio  
264 of sequencing grade modified trypsin (Promega). 50% trifluoroacetic acid (TFA) was  
265 added to lower the pH to 2 in order to stop the tryptic digest and to precipitate the  
266 RapiGEST. Water-immiscible degradation products of RapiGEST were pelleted by  
267 centrifugation at  $12,000 \times g$  for 10 min. The cleared peptide solution was desalted with  
268 C18 reversed-phase columns (SepWPak Vac C18, Waters). The columns were pre-

269 conditioned 2-3 times with acetonitrile and equilibrated 3 times with Buffer A (2%  
270 acetonitrile, 0.1% trifluoroacetic acid in H<sub>2</sub>O) prior to sample loading. The flow-through  
271 was re-loaded onto the column and the column was then washed 3 times with Buffer A.  
272 The peptides were eluted from the column using Buffer B (50% acetonitrile, 0.1%  
273 trifluoroacetic acid in H<sub>2</sub>O) and the elution step was repeated. The eluate was dried  
274 under vacuum using a rotary evaporator at 45°C. Dried peptide pellets were re-  
275 suspended in MS buffer (2% acetonitrile, 0.1% trifluoroacetic acid in ultra pure H<sub>2</sub>O) to a  
276 concentration of 1 µg/µl, sonicated in a water bath for 3 min and supernatant was  
277 harvested by centrifugation at 12,000 × g for 10 min.

278 SWATH mass spectrometry measurements were conducted at the Institute for  
279 Molecular Systems Biology at ETH Zurich. 1 µg of each peptide sample was measured in  
280 SWATH mode on a TripleTOF 5600 mass spectrometer using data-independent  
281 acquisition settings as described earlier (29, 38-40). Resulting raw SWATH data was  
282 analysed using an automated pipeline and the software OpenSWATH with the *M.*  
283 *tuberculosis* H37Rv SWATH assay library (38). Differential expression analysis of protein  
284 identified in *M. tuberculosis* and *M. bovis* samples was dependent on the detection of  
285 the protein in both species. The difference in protein fold changes and the  
286 corresponding FDR corrections between *M. tuberculosis* and *M. bovis* were calculated  
287 using MSstats (39, 41). A  $|\text{Log}_2\text{FC}| > 0.56$  and an FDR < 0.05 was required for a protein  
288 to defined as differentially expressed between *M. tuberculosis* and *M. bovis*.

## 289 **Animals**

290 All animal procedures were performed according to the provisions of the Irish  
291 Cruelty to Animals Act of 1876 with ethical approval from the University College Dublin  
292 (UCD) Animal Ethics Committee (protocol number AREC-13-14-Gordon). Ten unrelated  
293 Holstein-Friesian male calves (7-12 weeks old) were maintained under uniform housing  
294 conditions and nutritional regimens at the UCD Lyons Research Farm (Newcastle,  
295 County Kildare, Ireland). All animals were selected from a tuberculosis-free herd that is  
296 screened annually using the single intradermal comparative tuberculin skin test.

### 297 **Alveolar macrophage isolation, cell culture and infection**

298 The laboratory methods used to: (1) isolate, culture and infect bovine alveolar  
299 macrophages with *M. bovis* and *M. tuberculosis*, and (2) generate strand-specific RNA-  
300 seq libraries using RNA harvested from these cells has been described in detail by us  
301 elsewhere (15, 42). An abridged description of the laboratory methods used in this study  
302 is provided below and the complete bioinformatics pipeline is accessible online  
303 (<https://github.com/kerrimalone/AlvMac>). Total lung cells were harvested by  
304 pulmonary lavage of lungs obtained post-mortem and stored in freezing solution (10%  
305 DMSO (Sigma-Aldrich Ltd.), 90% FBS) at a density of  $2.5 \times 10^7$  cells/ml in 1 ml cell  
306 aliquots at  $-140^\circ\text{C}$ . When required, the cell pellet was resuspended in 15 ml of R10<sup>+</sup>  
307 media and placed in a 75 cm<sup>2</sup> vented culture flask (CELLSTAR®, Greiner Bio-One Ltd.)  
308 and incubated for 24 h at 37°C, 5 % CO<sub>2</sub>. After incubation, media was removed together  
309 with non-adherent cells, adherent cells were washed with 15 ml HBSS pre-warmed to  
310 37°C and dissociated by adding 10 ml pre-warmed 1× non-enzymatic cell dissociation  
311 solution (Sigma-Aldrich Ltd.) to each culture flask. Cells were then pelleted (200 × g for 5

312 min), resuspended in 10 ml pre-warmed R10+ media and counted using a Vi-CELL™ XR  
313 Cell Viability Analyzer and reagent kit (Beckman Coulter Inc.). Mean viable cell recovery  
314 was estimated at ~ 80% for each animal. Cell counts for each animal were adjusted to  
315  $5 \times 10^5$  cells/ml (based on viable cell counts) using pre-warmed R10+ media, seeded at  
316  $5 \times 10^5$  cells/well on individual 24-flat well tissue culture plates (Sarstedt Ltd.) and  
317 incubated for a further 24 h at 37°C, 5 % CO<sub>2</sub>, until required for mycobacterial infection.  
318 The purity of the seeded macrophages for each animal samples was 95% as estimated  
319 by flow cytometry analysis (data not shown).

320 *M. bovis* AF2122/97 and *M. tuberculosis* H37Rv were cultured in Middlebrook  
321 7H9-ADC medium containing either 0.2% v/v glycerol for *M. tuberculosis* or 10 mM  
322 sodium pyruvate for *M. bovis* at 37°C until mid-logarithmic phase. Prior to infection,  
323 mycobacterial cultures were pelleted by centrifugation (200 × g, 10 min), pellets were  
324 disrupted with 3 mm sterile glass beads (Sigma-Aldrich Ltd.) by vortexing at top speed,  
325 1 min. Cells were resuspended in pre-warmed R10 media, sonicated at full power  
326 (Branson Ultrasonics Corporation) for 1 min and the cell number was then adjusted to  
327  $5 \times 10^6$  bacterial cells/ml (OD<sub>600nm</sub> of 0.1 =  $1 \times 10^7$  bacterial cells) for a multiplicity of  
328 infection (MOI) of 10 bacilli per alveolar macrophage.

329 For the infection time course, the R10 media was removed from the macrophages  
330 and replaced with 1 ml R10 media containing *M. bovis* or *M. tuberculosis* ( $5 \times 10^6$   
331 bacilli/ml); parallel non-infected control alveolar macrophages received 1 ml R10 media  
332 only. The alveolar macrophages were incubated at 37°C, 5 % CO<sub>2</sub> for times of 2, 6, 24



333 and 48 hours post-infection (hpi). Following completion of the 2 hpi time point, the 2 hpi  
334 macrophages were lysed (by adding 250  $\mu$ l RLT-1%  $\beta$ -mercaptoethanol buffer per tissue  
335 culture plate well) and stored at  $-80^{\circ}\text{C}$ , while the media for the 6, 24 and 48 hpi  
336 macrophages was replaced with 1 ml fresh R10 media per well and cells were  
337 reincubated at  $37^{\circ}\text{C}$ , 5 %  $\text{CO}_2$  until required for harvesting. CFU were monitored over  
338 the infection time course (Fig.S1).

339 **RNA extraction, RNA-seq library preparation and high-throughput sequencing for**  
340 **bovine alveolar macrophage samples**

341 For the current study, 117 strand-specific RNA-seq libraries were prepared. These  
342 comprised *M. bovis*-, *M. tuberculosis*- and non-infected samples from each time point  
343 (0, 2, 6, 24 and 48 h) across 10 animals (with the exception of one animal that did not  
344 yield sufficient alveolar macrophages for *in vitro* infection at the 48 hpi time point). RNA  
345 extractions from macrophage lysates included an on-column genomic DNA elimination  
346 step (RNeasy<sup>®</sup> Plus Mini kit (Qiagen Ltd)). RNA quantity and quality was assessed using a  
347 NanoDrop<sup>™</sup> 1000 spectrophotometer (Thermo Fisher Scientific Inc.) and a Bioanalyzer  
348 and an RNA 6000 Nano LabChip kit (Agilent Technologies Ltd). All samples displayed  
349 260/280 ratio > 2.0 and RNA integrity numbers > 8.5. 200 ng total RNA from each  
350 sample was used for RNA-seq library preparation. Poly(A) mRNA enrichment was  
351 performed (Dynabeads<sup>®</sup> mRNA DIRECT<sup>™</sup> Purification Kit (Invitrogen, Life Technologies))  
352 and Poly(A)-enriched mRNA was used to prepared individually barcoded strand-specific  
353 RNA-seq libraries (ScriptSeq<sup>™</sup> version 2 RNA-Seq Library Preparation Kit (Illumina, San  
354 Diego, CA, USA)). The libraries were pooled into three sequencing pools and sequenced

355 across 24 flow cell lanes (Illumina<sup>®</sup> HiSeq2000, Beijing Genomics Institute, Shenzhen,  
356 China).

### 357 **Differential gene expression analysis of bovine alveolar macrophage RNA-sequencing** 358 **data**

359 Computational analyses was performed on a 32-node Compute Server with Linux  
360 Ubuntu [version 12.04.2]. Briefly, pooled libraries were deconvoluted, adapter sequence  
361 contamination and paired-end reads of poor quality were removed. At each step, read  
362 quality was assessed with FastQC [version 0.10.1] (30). Paired-end reads were aligned to  
363 the *Bos taurus* reference genome (*B. taurus* UMD3.1.1) with STAR aligner (43). Read  
364 counts for each gene were calculated using featureCounts, set to unambiguously assign  
365 uniquely aligned paired-end reads in a stranded manner to gene exon annotation (32).  
366 Differential gene expression analysis was performed using the edgeR Bioconductor  
367 package that was customized to filter out all bovine rRNA genes, genes displaying  
368 expression levels below one count per million [CPM] in at least ten individual libraries  
369 and identify differentially expressed (DE) genes between all pairs of infection groups  
370 within each time point, correcting for multiple testing using the Benjamini-Hochberg  
371 method with  $\text{Log}_2\text{FC} > 1$  and  $< -1$  and an FDR threshold of significance  $< 0.05$  (44, 45).  
372 Cellular functions and pathways over-represented in DE gene lists were assessed using  
373 the SIGORA R package (46).

### 374 **Data availability**

375 RNA-seq datasets can be found using accession number PRJEB23469. SWATH MS data  
376 and OpenSWATH outputs can be found on PeptideAtlas under identifier PASS00685  
377 (<http://www.peptideatlas.org/PASS/PASS00685>).

378

379

## 380 Results

### 381 Differential RNA and protein expression between *M. bovis* and *M. tuberculosis*

382 For this study, 12 strand-specific RNA-seq libraries were prepared from *M. bovis*  
383 AF2122/97 ( $n = 6$ ) and *M. tuberculosis* H37Rv ( $n = 6$ ) grown exponentially in Sauton's  
384 basal media pH 7.0 (Fig.S2; mapping statistics can be found in Supp\_II.csv). An  
385 'Identical'/'Variable' gene dataset was constructed where orthologous genes between  
386 the two species were separated into those genes whose protein products are of equal  
387 length and 100% conserved at the amino acid level (Identical,  $n = 2,775$ ) from those that  
388 are not (Variable,  $n = 1,224$ ). (Fig.1A, Supp\_I.xlsx). 170 and 146 differentially expressed  
389 (DE) Identical genes and 133 and 124 DE Variable genes were identified for *M. bovis* and  
390 *M. tuberculosis* respectively, amounting to 573 DE genes in total (Fig.1A, B,  
391 Supp\_III.xlsx). Twelve SWATH mass spectrometry (MS) datasets were generated from  
392 total protein samples harvested from the same cultures as the RNA (Fig.S2, Fig.S4,  
393 Supp\_III.xlsx). Overall, 2,627 proteins were detected using the *M. tuberculosis* assay  
394 library (~70% and ~56% of total Identical and Variable protein, respectively) (Fig.S4,  
395 Supp\_III.xlsx) (38, 40). Of the 1,937 Identical proteins detected by SWATH MS, 232 and  
396 218 proteins were found to be upregulated *M. bovis* and *M. tuberculosis* respectively,  
397 totalling 450 DE proteins (Fig.1A, B, Supp\_III.xlsx). 133 and 215 Variable proteins were  
398 found to be upregulated *M. bovis* and *M. tuberculosis* respectively, amounting to 348 DE  
399 Variable proteins in total (50.4%) (Fig.1A, B, Supp\_III.xlsx). Overlap of the DE lists for *M.*  
400 *bovis* and *M. tuberculosis* revealed 77 and 103 genes that are significantly upregulated

401 in either species at both the RNA and protein level respectively (Fig.1D); the top 20 of  
402 these are represented in Fig.1C.

403 Genes encoding Mpt70 and Mpt83 are the top two genes upregulated at the RNA  
404 and protein level in *M. bovis*; this is a result of a non-operational anti-SigK protein in *M.*  
405 *bovis* leading to constitutive upregulation of the SigK regulon, of which the *mpt83* and  
406 *mpt70* genes are components (47). Furthermore, Rv0216/Mb0222, a double hotdog  
407 hydratase, is upregulated in *M. bovis* at both the RNA and protein level as previously  
408 observed by microarray analysis (27). Amongst the genes upregulated at both the RNA  
409 and protein level in *M. tuberculosis* H37Rv are: *ppe51*; antitoxin *vapB47*; and nitrate  
410 reductase associated genes *narH* and *narG*, previously reported as upregulated at the  
411 RNA level in *M. tuberculosis* in comparison to *M. bovis* as a result of a SNP in the  
412 promoter region of *narGHJI* (Fig.1C)(25, 26). Incomplete overlap between DE genes at  
413 the transcriptional and translational level seen in this study has been reported in other  
414 studies and can be attributed to post-transcriptional and post-translational regulation  
415 within the cell, but also to more technical aspects, such as differences in detection limits  
416 and particular thresholds chosen to define differentially expressed RNA or protein (48-  
417 50).

418

#### 419 **Transcription factor enrichment analysis: the PhoP regulon and ESX-1 secretion system**

420 The differential gene expression observed between *M. bovis* and *M. tuberculosis*  
421 may be a consequence of differences in global transcriptional network regulation

422 between the two species. To address this hypothesis, a formal transcription factor  
423 enrichment analysis was performed and revealed the significant association of 16  
424 transcription factors with the DE Identical genes between *M. bovis* ( $n = 146$ ) and *M.*  
425 *tuberculosis* ( $n = 170$ ) (Fig.1E) (37). The association of transcription factors such as  
426 alternate sigma factors SigK and SigF along with cytoplasmic redox sensor WhiB3 with  
427 the DE gene lists indicates that disparate expression of virulence-related pathways  
428 regulated by these transcription factors between the two pathogens could have  
429 significant consequence for infection (47, 51, 52). Furthermore, PhoP, EspR and DosR  
430 are also significantly associated with the DE genes; these transcription factors are  
431 important for adaptation of *M. tuberculosis* to the intracellular environment and are  
432 functionally linked by such processes (Fig.1E) (53, 54).

433         The PhoPR two-component system has a major role in regulating the pathogenic  
434 phenotype of *M. tuberculosis* by controlling the expression of a variety of virulence-  
435 associated pathways including SL-1, DAT and PAT lipid production and the Type-VII  
436 secretion system ESX-1; mutations in the PhoPR system of *M. bovis* have been  
437 suggested to play a role in the host specificity between the bovine- and human-adapted  
438 mycobacterial species (23, 53, 55-57). Further investigation into the 72-gene regulon of  
439 PhoP identified 33 DE genes between the two species and these are presented in Fig.2A.  
440 The production of lipids SL-1 and PDIM is under PhoP regulation and is coupled within  
441 the *M. tuberculosis* cell; intriguingly *M. bovis* is reported to lack SL-1 in the cell envelope  
442 (58-60). In this study, the expression of genes associated with the biosynthesis of SL-1  
443 (*e.g. papA1, papA2, pks2, mmpL8*) was at a higher level in *M. tuberculosis* and

444 conversely, genes associated with the biosynthesis of PDIM (*e.g. ppsA-E, lppX*) were  
445 expressed at a higher level in *M. bovis* at the RNA and protein level (Fig.S5). SL-1 is one  
446 of the most abundant lipids in the mycobacterial outer membrane, is unique to  
447 pathogenic mycobacteria, is immunogenic, and is implicated in the alteration of phago-  
448 lysosome fusion. Likewise, PDIM is required for mycobacterial virulence, facilitates  
449 macrophage invasion and protects against reactive nitrogen species. The differential  
450 expression of lipid-associated systems between the two species therefore presents  
451 distinct lipid-repertoires to interact with the host that could affect the overall success of  
452 infection (61-67).

453         The major antigens ESAT-6 and CFP10 are secreted by the ESX-1 secretion system  
454 of *M. tuberculosis*, a system which has been implicated in mycobacterial escape from  
455 the phagosome to the cytosol that results in a Type-I interferon response within the  
456 infected macrophage (57, 68, 69). PhoP and EspR regulate the expression of ESX-1  
457 secretion system-related genes and as stated are significantly associated with the DE  
458 genes between the two pathogens; despite EspR being expressed to a higher level in *M.*  
459 *tuberculosis* (Supp\_III.xlsx), there is a significant upregulation of the ESX-1 secretion  
460 system in *M. bovis* in comparison to *M. tuberculosis*, including ESX-1-related proteins  
461 such as EsxA, EspA, EspC, EspD at both the transcriptional and translational level (55-57,  
462 70, 71) (Fig.2B). Furthermore, PhoP was expressed to a higher level in *M. bovis*; this may  
463 represent an attempt at a compensatory mechanism for aberrant PhoP signalling and  
464 supports previous reports of suboptimal PhoP signalling in *M. bovis* (23, 59). Seven of 55  
465 genes regulated by DosR were expressed higher at the RNA level in *M. tuberculosis*,

466 likely reflecting the intimate relationship of DosR and its associated regulon with that of  
467 PhoP/EspR/WhiB3 (Supp\_IV.xlsx).

468

469 **A “core” macrophage response common to infection with either species**

470 117 strand-specific RNA-seq libraries were prepared from bovine alveolar  
471 infected macrophages that comprised *M. bovis*-, *M. tuberculosis*- and non-infected  
472 samples from each time point (0, 2, 6, 24 and 48 hpi) across 10 animals, with the  
473 exception of one animal that did not yield sufficient alveolar macrophages for *in vitro*  
474 infection at the 48 hour post-infection time point). Matched non-infected macrophage  
475 control samples were included for all infection time-points (Fig.S2). Quality control and  
476 mapping statistics can be found in Supp\_V.csv and Fig.S5.

477 The comparison of *M. bovis*- or *M. tuberculosis*-infected macrophages with  
478 respect to non-infected macrophages revealed a sequential increase in the number of  
479 DE genes across the infection time-course, which peaked at 48 hpi and a larger number  
480 of DE genes were seen in *M. bovis*-infected macrophages with the exception of 6 hpi  
481 (Fig.3A, B, C, Supp\_VI.csv); similar temporal expression profiles were previously  
482 reported in other *in vitro* bovine and human macrophage infection studies (42, 72-74).  
483 Comparison of these DE gene lists identified a subset of genes that displayed the same  
484 directionality and a similar magnitude of expression (Fig.4A) (Supp\_VII.csv). The  
485 association of enriched pathways such as *Cytokine-cytokine receptor interaction*, *NOD-*  
486 *like receptor signalling* and *Jak-STAT signalling* with this gene subset suggests a robust



487 “core” macrophage response to infection with either mycobacterial species throughout  
488 the time course (Fig.4B). The core response includes numerous key genes known to be  
489 involved in the innate immune response against pathogenic mycobacteria such as:  
490 *CCL20* (75); *IL18*, which limits the growth of *M. tuberculosis* in human macrophages (76-  
491 78); anti-inflammatory *IL10* (79); and *NOS2*, polymorphisms of which are associated with  
492 susceptibility of Holstein cattle to bovine TB (80) (Fig.4C). Furthermore, the *HIF-1*  
493 signalling pathway was significantly enriched for the DE genes common to both infection  
494 series; this pathway is associated with regulating a switch in central glucose metabolism  
495 during high-energy demanding events, such as infection, in neutrophils and  
496 macrophages (81)(Fig.S6A).

497

498 **DNA sensing and RIG-I like signalling pathways are found in the divergent response to**  
499 **infection with *M. tuberculosis* and *M. bovis***

500       Aside from the defined “core” response genes, there were larger numbers of DE  
501 genes in *M. bovis*-infected macrophages in contrast to *M. tuberculosis* infection, mainly  
502 at 24 hpi (1,313 versus 904 genes respectively) and 48 hpi (2,271 versus 1,037 genes  
503 respectively) (Fig.3A, B). Comparison of the relative change with respect to control  
504 between *M. bovis*- and *M. tuberculosis*-infected macrophages at each time-point  
505 revealed a statistically significant divergence in their responses at 48 hpi only associated  
506 with DE signatures from 703 genes (Fig.4A, Supp\_VIII.csv). Analysis of the expression  
507 pattern of 576 of these genes with functional annotation across time revealed a greater  
508 magnitude of change in *M. bovis*- infected macrophages, where DE genes are up- or

509 down-regulated to a higher extent in *M. bovis*-infected macrophages or not significantly  
510 changing at all in *M. tuberculosis*-infected macrophages (Fig.5C). Pathway enrichment  
511 analysis revealed association of *ABC transporters* with the divergent annotated gene set  
512 (Fig.5B); these are involved in cholesterol efflux from the cell, and manipulation of host  
513 cell cholesterol transport and metabolism has been documented in *M. tuberculosis*  
514 containing macrophages (82). A general dampening in the expression of cholesterol-  
515 associated genes was noted in *M. bovis*-infected macrophages at 48 hpi (Fig.S6B).  
516 Pathway enrichment analysis also associated *Cytosolic DNA-sensing* and *RIG-I-like*  
517 *receptor signalling* with the 576 divergent genes (Fig.5C). Type-I interferons have been  
518 associated with pathogenesis during *M. tuberculosis* infection and their production has  
519 been found dependent on the mycobacterial ESX-1 secretion system and the cytosolic  
520 sensing of extracellular *M. tuberculosis* DNA and subsequent cGAS-STING-dependent  
521 signalling (83-86).

522 Overall, there is a stronger upregulation of genes encoding proteins involved in  
523 *RIG-I-like* and *DNA-sensing* signalling in *M. bovis*-infected macrophages in comparison to  
524 *M. tuberculosis*-infected macrophages at 48 hpi. These include genes encoding DNA  
525 sensors such as MB21D1/cGAS, MDA5, IFI16, and DDX58/RIG-I, antiviral and MAVS-TBK1  
526 interacting protein IFIT3, serine/threonine kinase TBK1, and key interferon-I  
527 transcriptional regulators IRF3 and IRF7 that are all known to contribute to STING-  
528 dependent induction of type-I interferons (Fig.5D, Fig.6) (87-89). Furthermore, genes  
529 *LGP2*, *ISG15* and *TRIM25* that encode regulators of *DDX58/RIGI* gene expression are  
530 upregulated in *M. bovis*-infected macrophages at 48 hpi (90). Likewise, downstream of

531 RIG-I, genes *IKBKB* and *IKB* are also expressed higher in *M. bovis*-infected macrophages  
532 along with *NFKB*, the gene encoding a key transcription factor that regulates the  
533 expression of inflammatory-related genes (89). Targets of *NFKB* such as *TNF*, *COX2*,  
534 *CXC40*, *MIP1 $\alpha$* , *IL8*, *IL12* and *IL23 $\alpha$*  are all expressed to a higher degree in *M. bovis*-  
535 infected macrophages with respect to *M. tuberculosis*-infected macrophages at 48 hpi  
536 (Fig.5D, Fig.6). A low level of reads mapped to the type I interferon genes *IFNAD*  
537 (orthologue of human *IFNA1*) and *IFNB1*, and only in a subset of animals at certain time  
538 points excluded these genes from DE analysis based on filtering criteria.

539

540 Independent of RIG-I signalling, genes involved in *DNA sensing* such as *TREX1*,  
541 which encodes a 3'-5' exonuclease that senses and degrades cytosolic DNA to prevent  
542 type I interferon production through the *TBK1/STING/IRF3* pathway, and *OAS2* were  
543 also found expressed to a higher level in *M. bovis* containing macrophages (91). *OAS2* is  
544 a double stranded RNA binding protein that generates 2'-5'- adenosine oligomers which  
545 activate RNase L resulting in the assembly of the *NLRP3* inflammasome and *IL-1 $\beta$*   
546 production (92, 93); genes *RNASEL*, *NLRP3* and non-canonical activation of the *NLRP3*  
547 inflammasome *CASP4* were all found expressed to a higher level in *M. bovis*-infected  
548 macrophages 48hpi (94, 95) (Fig.4c, Fig.6). Taken together, these data highlight  
549 dissimilarity in the engagement between *M. bovis* and *M. tuberculosis* with the nucleic  
550 acid sensing system of the bovine macrophage, which in turn would influence  
551 downstream immune-related events, and ultimately infection outcome.

552 **Discussion**

553           The data we present here provides significant insight on the molecular basis of  
554 host tropism between *M. tuberculosis* and *M. bovis* in the bovine host. Determining the  
555 differences between the transcriptional and translational profiles of these two hallmark  
556 mycobacterial strains highlighted variable expression of virulence-associated pathways  
557 while a divergent transcriptional response to infection with either species in bovine  
558 alveolar macrophages was observed 48 hpi. The ESX-1 secretion system of *M.*  
559 *tuberculosis* is linked to its phagosomal escape during infection, a process that is  
560 coupled to the triggering of DNA-sensing pathways in the cytosol of the host cell (83-  
561 86). In this study, we found that the ESX-1 secretion system was expressed to a higher  
562 level in *M. bovis* and a substantially stronger induction of DNA-sensing related pathways  
563 was seen in bovine alveolar macrophages infected with *M. bovis* versus *M. tuberculosis*.  
564 These data therefore suggest that *M. bovis* has a distinct engagement with the bovine  
565 immune system and might thus be better able to drive phagosome rupture and  
566 downstream immune signalling, leading to successful infection and ultimately disease.

567

568           In this study, we have taken advantage of both RNA-seq and SWATH mass  
569 spectrometry to compare both the global transcriptional and translational expression  
570 profiles of the human and bovine tubercle bacilli for definition of functional variation  
571 between the two species that may explain their exhibited host preference. Other  
572 studies have assessed in isolation either the transcriptome by microarray or the  
573 proteome by shotgun mass spectrometry (27, 28, 96, 97); the resolution afforded by

574 both RNA-seq and SWATH mass spectrometry in comparison to previous studies has  
575 allowed for the most complete dataset for *M. bovis* to date and the most complete  
576 comparative dataset between the two pathogens. Although conducting a dual RNA-  
577 sequencing study may facilitate simultaneous assessment of the transcriptional  
578 response of both the host macrophage and invading mycobacteria during infection, this  
579 technique is limited with regards to the proportion of the bacterial-to-host  
580 transcriptome ratio in the resulting data and it does not allow for the accurate capture  
581 of both the global transcriptomic and proteomic dynamics of the mycobacteria during  
582 infection (98). As we aimed to investigate the early response of the macrophage to  
583 infection with both mycobacterial species, we believe the overall expression profiles  
584 measured in this study *in vitro* more realistically represent the bacterial phenotypes first  
585 encountered by the host cell. Lastly, we focused on *M. tuberculosis* H37Rv and *M. bovis*  
586 AF2122/97 as they are widely used reference strains and they have been previously  
587 used to demonstrate the attenuation of *M. tuberculosis* in the bovine host (1, 9).

588

589         The relatively small number of DE genes at both the RNA and protein level  
590 between *M. bovis* and *M. tuberculosis* highlights the close genetic relationship between  
591 the two pathogens. That being said, assessment of these DE genes supports our  
592 hypothesis that subtle genetic changes between the two species result in divergent  
593 phenotypes driven by differential expression of major virulence associated factors and  
594 pathways. We found that transcription factors PhoP, WhiB3 and DosR are significantly  
595 associated with the DE genes between the two species and these are functionally linked

596 by processes that govern the adaptation of *M. tuberculosis* to the intracellular  
597 environment (53, 54). The PhoPR two-component system is important for *M.*  
598 *tuberculosis* infection and it has been suggested that mutations in PhoR attenuate  
599 animal-adapted *M. bovis* in humans (23, 99-105). PhoP regulates the production of  
600 virulence associated cell wall lipids and controls the expression of EspA, an ESX-1  
601 secretion pathway related protein involved in the secretion of the major antigen  
602 EsxA/ESAT6 (55, 56, 70, 71). We found that the ESX-1 secretion system is expressed to a  
603 higher degree at both the RNA and protein level in *M. bovis* in comparison to *M.*  
604 *tuberculosis*; differences in ESX-1 secretion system expression between the two  
605 pathogens may be a consequence of a SNP in the promoter of the *whiB6* gene in *M.*  
606 *tuberculosis* H37Rv or attributed to attenuated PhoPR signalling in *M. bovis* (56). There  
607 is an emerging body of evidence showing that *M. tuberculosis* can rupture the  
608 phagosome membrane through the action of the ESX-1 secretion system and that the  
609 activation of cytosolic DNA-sensing pathways and the production of Type-I interferons is  
610 dependent on ESX-1 expression (83-86). Based on our data, we speculate that alternate  
611 transcriptional regulation between *M. tuberculosis* and *M. bovis* as a consequence of  
612 genetic variation may represent differential priming events in preparation for the initial  
613 interactions of both species with their respective host immune systems. For example,  
614 increased expression ESX-1 secretion system may facilitate faster escape of *M. bovis*  
615 from the phagosome into the cytosol in contrast to *M. tuberculosis*, triggering DNA-  
616 sensing pathways and increased type I interferon production (68, 85, 106).

617

618 To determine the impact of pathogen variation on host response, we conducted  
619 an experimental infection of primary bovine alveolar macrophages with *M. tuberculosis*  
620 and *M. bovis* and tracked the transcriptional response to infection. The bovine alveolar  
621 macrophage response to infection with either pathogen was strikingly similar over the  
622 first 24 hours of infection. Notably, a “core” macrophage response displayed  
623 enrichment for differentially expressed genes involved in pathogen recognition, innate  
624 cell signalling, and cytokine and chemokine production illustrating the initiation of host  
625 innate defence mechanisms in response to infection with *M. bovis* and *M. tuberculosis*.  
626 One of the most striking observations is that divergence in macrophage gene expression  
627 profiles between *M. bovis* and *M. tuberculosis* infections only occurs after 24 h, with *M.*  
628 *bovis* infection eliciting a stronger response in comparison to *M. tuberculosis*. At 48 hpi,  
629 enrichment for *DNA sensing* was found for 576 annotated genes that show divergent  
630 expression patterns between the two infection models. The innate immune system  
631 detects exogenous nucleic acid within the cell through pattern recognition receptors  
632 (PRRs) that include Absent in Melanoma 2 (AIM2)-like receptors (ALRs) with Pyrin and  
633 HIN domains (PYHIN proteins), *e.g.* IFI16 (107-109). Other DNA-sensing proteins include  
634 cytosolic RIG-I-like receptors (RLR), (*e.g.* RIG-I, MDA5, LGP2), exonucleases, synthetases,  
635 and cyclic GMP-AMP synthases (*e.g.* TREX1, OAS2 and cGAS) (83, 91, 93, 110, 111). A  
636 stronger transcriptional induction of genes associated with cGAS-STING dependent  
637 signalling was seen in macrophages infected with *M. bovis* including *MB21D1/cGAS* and  
638 downstream effectors *TBK1* and *IRF3* (Fig.6). cGAS has a central role during *M.*  
639 *tuberculosis* infection; 48-72 hpi cGAS senses *M. tuberculosis* in the host cell cytosol and

640 in turn signals through STING to drive type-I interferon production (Fig.6) (68, 83-86,  
641 112). Surprisingly, the cGAS-STING axis was not the only PRR pathway found  
642 upregulated during mycobacterial infection as *RIG-I like signalling* pathway was also  
643 observed to be enriched at 48 hpi, with genes encoding TREX1, OAS2, and RLR receptors  
644 RIG-I, MDA5 and LGP2 also found expressed to a higher level in *M. bovis*-infected  
645 macrophages. As we hypothesised that the variation in host response at 48 hpi, and  
646 ultimately host tropism, is driven by differential expression of virulence factors between  
647 *M. bovis* and *M. tuberculosis*, the identification of an increase in expression of DNA-  
648 sensing related pathways in *M. bovis*-infected macrophages at 48 hpi coincides with the  
649 differential expression of the ESX-1 secretion system between the two pathogens. A  
650 further role for the ESX-1 secretion system in host-pathogen interactions is described  
651 through the activation of the host NLRP3 inflammasome and the production of IL-1 $\beta$   
652 (113-116). Transcriptional signals associated with the NLRP3 inflammasome were higher  
653 in *M. bovis*-infected macrophages at 48 hpi along with the increased expression of  
654 *CASP4*, an NLRP3 inflammasome activator, which has a central role in mediating the  
655 response to *Legionella*, *Yersinia* and *Salmonella* bacterial infection in primary human  
656 macrophages and that has been found upregulated in the necrotic granuloma model of  
657 mice and lymph nodes of TB patients (92, 117-119). Altogether, these data therefore  
658 suggest that not only does mycobacterial infection in the bovine macrophage trigger an  
659 increase in the transcription of the cGAS/STING/IRF3 pathway previously characterised  
660 as responsible for type-I interferon production during *M. tuberculosis* infection, it also  
661 triggers alteration in the transcription of genes encoding auxiliary DNA sensing RLR



662 receptors including RIG-I, MDA5 and TREX1, that likewise converge to signal through the  
663 STING complex (Fig.6). Furthermore, the data highlights that *M. bovis* drives a stronger  
664 transcriptional response in the aforementioned pathways in the bovine alveolar  
665 macrophage at 48 hpi in comparison to *M. tuberculosis*, again highlighting a distinct  
666 relationship between the bovine pathogen and the bovine host.

667

668 Altogether, the upregulation of the ESX1 secretion system at both the RNA and  
669 protein level in *M. bovis* with the observed upregulation of DNA-sensing pathways and  
670 the NLRP3/IL-1b pathway in *M. bovis*-infected macrophages suggests that the  
671 expression level of virulence factors, rather than the presence or absence of them  
672 between the highly related *M. bovis* and *M. tuberculosis*, drives divergent host  
673 responses and influences infection outcome overall. Indeed, the idea of a ‘perfect  
674 balance’ with regards to the expression of mycobacterial virulence factors is reflected in  
675 the findings that production of IFN- $\beta$ 1 in monocyte-derived macrophages is strain  
676 dependent amongst the *M. tuberculosis* lineages (120). That being said, we cannot  
677 disregard that genetic differences between the bovine and human host may play a  
678 factor. As the innate immune response in different mammals can vary, diversity in the  
679 expression and structure in key innate immune genes and engagement with pathogen  
680 factors must play major roles in host specificity and the outcome of pathogen encounter  
681 (121). In this regard, it is interesting to note that the bovine PYHIN locus contains only  
682 *IFI16* (bovine PYHIN) and cattle are the only mammals to date found to encode a single  
683 member of PYHIN protein family; in contrast, humans have four genes, and mice 13

684 genes (122). Furthermore, polymorphisms in *NLRP3* have been found to influence host  
685 susceptibility to *M. tuberculosis* infection, its induction is associated with the  
686 mycobacterial ESX-1 secretion system, and bovine and human NLRP3 proteins share  
687 83% sequence identity (123). Further comparative studies of human and bovine genetics  
688 will ultimately aid in unravelling the complex differential host response to infection with  
689 both pathogens. Moreover, we cannot overlook other virulence-associated factors  
690 besides the ESX-1 secretion system that differ in expression or sequence between  
691 *M. bovis* and *M. tuberculosis*. Indeed, antigens MBP83 and MBP70, that show  
692 constitutive upregulation in *M. bovis* versus *M. tuberculosis* and pathways such as ESX-3  
693 and Mce-1 were also found differentially expressed between the two pathogens at both  
694 the transcriptional and translational level during *in vitro* growth in this study  
695 (Supp\_III.xlsx) (47, 124).

696

697 In conclusion, we found that *M. tuberculosis* H37Rv and *M. bovis* AF2122/97  
698 induce divergent responses in infected bovine alveolar macrophages, a consequence of  
699 the differential expression of key mycobacterial virulence-associated pathways. Our  
700 work demonstrates the specificity of mycobacterial host-pathogen interaction and  
701 indicates how the subtle interplay between the phenotype of the invading mycobacteria  
702 and the subsequent host response may underpin host specificity amongst members of  
703 the MTBC.

704

705

706 **Acknowledgements:**

707 We would like to thank Dr. Christina Ludwig for help with the SWATH mass  
708 spectrometry measurements and Dr. Maximiliano Gutierrez for valuable input and  
709 discussion. We gratefully acknowledge funding from Science Foundation Ireland through  
710 SFI Investigator Awards 08/IN.1/B2038 and 15/IA/3154; the European Commission's  
711 H2020 program grant number 643381 (TBVAC2020); Wellcome Trust PhD awards  
712 097429/Z/11/Z (K.R-A.) and 102395/Z/13/Z (A.S.). The work was further supported by  
713 funding from SystemsX.ch/TbX (R.A.) and a research grant from Institut Mérieux (R.A.).

714

715 **References**

- 716 1. Whelan AO, Coad M, Cockle PJ, Hewinson G, Vordermeier M, Gordon SV. 2010.  
717 Revisiting host preference in the Mycobacterium tuberculosis complex:  
718 experimental infection shows M. tuberculosis H37Rv to be avirulent in cattle.  
719 PLoS One 5:e8527.
- 720 2. Garnier T, Eiglmeier K, Camus JC, Medina N, Mansoor H, Pryor M, Duthoy S,  
721 Grondin S, Lacroix C, Monsempe C, Simon S, Harris B, Atkin R, Doggett J, Mayes  
722 R, Keating L, Wheeler PR, Parkhill J, Barrell BG, Cole ST, Gordon SV, Hewinson RG.  
723 2003. The complete genome sequence of Mycobacterium bovis. Proc Natl Acad  
724 Sci U S A 100:7877-82.
- 725 3. Coscolla M, Gagneux S. 2014. Consequences of genomic diversity in  
726 Mycobacterium tuberculosis. Semin Immunol 26:431-44.
- 727 4. Malone KM, Gordon SV. 2017. Mycobacterium tuberculosis Complex Members  
728 Adapted to Wild and Domestic Animals. Adv Exp Med Biol 1019:135-154.
- 729 5. WHO. 2017. Global tuberculosis report.  
730 [http://www.who.int/tb/publications/global\\_report/en/](http://www.who.int/tb/publications/global_report/en/). Accessed
- 731 6. Abernethy DA, Upton P, Higgins IM, McGrath G, Goodchild AV, Rolfe SJ,  
732 Broughan JM, Downs SH, Clifton-Hadley R, Menzies FD, de la Rua-Domenech R,  
733 Blissitt MJ, Duignan A, More SJ. 2013. Bovine tuberculosis trends in the UK and  
734 the Republic of Ireland, 1995-2010. Vet Rec 172:312.
- 735 7. Mables HE, Okello A, Picozzi K, Welburn SC. 2014. Neglected zoonotic  
736 diseases-the long and winding road to advocacy. PLoS Negl Trop Dis 8:e2800.

- 737 8. Heath D. 2013. Response to FOI request about various bovine TB costs from  
738 2008 to 2013. In: Department for Environment, F A R A.
- 739 9. Bernardo Villarreal-Ramos SB, Adam Whelan, Sebastien Holbert, Florence  
740 Carreras, Francisco J. Salguero, Bhagwati Khatri, Kerri M. Malone, Kevin Rue-  
741 Albrecht, Ronan Shaughnessy, Alicia M. Smyth, Gobena Ameni, Abraham Aseffa,  
742 Pierre Sarradin, Nathalie Winter, Martin Vordermeier, Stephen V. Gordon. 2017.  
743 Experimental infection of cattle with Mycobacterium tuberculosis isolates shows  
744 the attenuation of the human tubercle bacillus for cattle. bioRxiv  
745 doi:<https://doi.org/10.1101/202663>.
- 746 10. Francis J. 1950. Control of infection with the bovine tubercle bacillus. *Lancet*  
747 1:34-9.
- 748 11. Magnus K. 1966. Epidemiological Basis of Tuberculosis Eradication 3. Risk of  
749 Pulmonary Tuberculosis after Human and Bovine Infection. *Bull World Health*  
750 *Organ* 35:483-508.
- 751 12. McNab F, Mayer-Barber K, Sher A, Wack A, O'Garra A. 2015. Type I interferons in  
752 infectious disease. *Nat Rev Immunol* 15:87-103.
- 753 13. Welin A, Lerm M. 2012. Inside or outside the phagosome? The controversy of  
754 the intracellular localization of Mycobacterium tuberculosis. *Tuberculosis (Edinb)*  
755 92:113-20.
- 756 14. Dorhoi A, Kaufmann SH. 2014. Perspectives on host adaptation in response to  
757 Mycobacterium tuberculosis: modulation of inflammation. *Semin Immunol*  
758 26:533-42.

- 759 15. Magee DA, Conlon KM, Nalpas NC, Browne JA, Pirson C, Healy C, McLoughlin KE,  
760 Chen J, Vordermeier HM, Gormley E, MacHugh DE, Gordon SV. 2014. Innate  
761 cytokine profiling of bovine alveolar macrophages reveals commonalities and  
762 divergence in the response to *Mycobacterium bovis* and *Mycobacterium*  
763 tuberculosis infection. *Tuberculosis (Edinb)* 94:441-50.
- 764 16. Piercy J, Werling D, Coffey TJ. 2007. Differential responses of bovine  
765 macrophages to infection with bovine-specific and non-bovine specific  
766 mycobacteria. *Tuberculosis (Edinb)* 87:415-20.
- 767 17. Marino S, Cilfone NA, Mattila JT, Linderman JJ, Flynn JL, Kirschner DE. 2015.  
768 Macrophage polarization drives granuloma outcome during *Mycobacterium*  
769 tuberculosis infection. *Infect Immun* 83:324-38.
- 770 18. Rajaram MV, Ni B, Dodd CE, Schlesinger LS. 2014. Macrophage  
771 immunoregulatory pathways in tuberculosis. *Semin Immunol* 26:471-85.
- 772 19. Cassidy JP, Martineau AR. 2014. Innate resistance to tuberculosis in man, cattle  
773 and laboratory animal models: nipping disease in the bud? *J Comp Pathol*  
774 151:291-308.
- 775 20. Widdison S, Watson M, Piercy J, Howard C, Coffey TJ. 2008. Granulocyte  
776 chemotactic properties of *M. tuberculosis* versus *M. bovis*-infected bovine  
777 alveolar macrophages. *Mol Immunol* 45:740-9.
- 778 21. Malone KM, Farrell D, Stuber TP, Schubert OT, Aebersold R, Robbe-Austerman S,  
779 Gordon SV. 2017. Updated Reference Genome Sequence and Annotation of  
780 *Mycobacterium bovis* AF2122/97. *Genome Announc* 5.

- 781 22. Cole ST, Brosch R, Parkhill J, Garnier T, Churcher C, Harris D, Gordon SV,  
782 Eiglmeier K, Gas S, Barry CE, 3rd, Tekaia F, Badcock K, Basham D, Brown D,  
783 Chillingworth T, Connor R, Davies R, Devlin K, Feltwell T, Gentles S, Hamlin N,  
784 Holroyd S, Hornsby T, Jagels K, Krogh A, McLean J, Moule S, Murphy L, Oliver K,  
785 Osborne J, Quail MA, Rajandream MA, Rogers J, Rutter S, Seeger K, Skelton J,  
786 Squares R, Squares S, Sulston JE, Taylor K, Whitehead S, Barrell BG. 1998.  
787 Deciphering the biology of *Mycobacterium tuberculosis* from the complete  
788 genome sequence. *Nature* 393:537-44.
- 789 23. Gonzalo-Asensio J, Malaga W, Pawlik A, Astarie-Dequeker C, Passemar C,  
790 Moreau F, Laval F, Daffe M, Martin C, Brosch R, Guilhot C. 2014. Evolutionary  
791 history of tuberculosis shaped by conserved mutations in the PhoPR virulence  
792 regulator. *Proc Natl Acad Sci U S A* 111:11491-6.
- 793 24. Malaga W, Constant P, Euphrasie D, Cataldi A, Daffe M, Reytrat JM, Guilhot C.  
794 2008. Deciphering the genetic bases of the structural diversity of phenolic  
795 glycolipids in strains of the *Mycobacterium tuberculosis* complex. *J Biol Chem*  
796 283:15177-84.
- 797 25. Sohaskey CD, Modesti L. 2009. Differences in nitrate reduction between  
798 *Mycobacterium tuberculosis* and *Mycobacterium bovis* are due to differential  
799 expression of both narGHJI and narK2. *FEMS Microbiol Lett* 290:129-34.
- 800 26. Stermann M, Bohrsen A, Diephaus C, Maass S, Bange FC. 2003. Polymorphic  
801 nucleotide within the promoter of nitrate reductase (NarGHJI) is specific for  
802 *Mycobacterium tuberculosis*. *J Clin Microbiol* 41:3252-9.

- 803 27. Golby P, Hatch KA, Bacon J, Cooney R, Riley P, Allnut J, Hinds J, Nunez J, Marsh  
804 PD, Hewinson RG, Gordon SV. 2007. Comparative transcriptomics reveals key  
805 gene expression differences between the human and bovine pathogens of the  
806 *Mycobacterium tuberculosis* complex. *Microbiology* 153:3323-36.
- 807 28. Rehren G, Walters S, Fontan P, Smith I, Zarraga AM. 2007. Differential gene  
808 expression between *Mycobacterium bovis* and *Mycobacterium tuberculosis*.  
809 *Tuberculosis (Edinb)* 87:347-59.
- 810 29. Gillet LC, Navarro P, Tate S, Rost H, Selevsek N, Reiter L, Bonner R, Aebersold R.  
811 2012. Targeted data extraction of the MS/MS spectra generated by data-  
812 independent acquisition: a new concept for consistent and accurate proteome  
813 analysis. *Mol Cell Proteomics* 11:O111 016717.
- 814 30. Andrews S. 2010. A quality control tool for high throughput sequence data.
- 815 31. Lunter G, Goodson M. 2011. Stampy: a statistical algorithm for sensitive and fast  
816 mapping of Illumina sequence reads. *Genome Res* 21:936-9.
- 817 32. Liao Y, Smyth GK, Shi W. 2014. featureCounts: an efficient general purpose  
818 program for assigning sequence reads to genomic features. *Bioinformatics*  
819 30:923-30.
- 820 33. Love MI, Huber W, Anders S. 2014. Moderated estimation of fold change and  
821 dispersion for RNA-seq data with DESeq2. *Genome Biol* 15:550.
- 822 34. Wagner GP, Kin K, Lynch VJ. 2012. Measurement of mRNA abundance using RNA-  
823 seq data: RPKM measure is inconsistent among samples. *Theory Biosci* 131:281-  
824 5.



- 825 35. Minch KJ, Rustad TR, Peterson EJ, Winkler J, Reiss DJ, Ma S, Hickey M, Brabant W,  
826 Morrison B, Turkarslan S, Mawhinney C, Galagan JE, Price ND, Baliga NS,  
827 Sherman DR. 2015. The DNA-binding network of Mycobacterium tuberculosis.  
828 Nat Commun 6:5829.
- 829 36. Rustad TR, Minch KJ, Ma S, Winkler JK, Hobbs S, Hickey M, Brabant W, Turkarslan  
830 S, Price ND, Baliga NS, Sherman DR. 2014. Mapping and manipulating the  
831 Mycobacterium tuberculosis transcriptome using a transcription factor  
832 overexpression-derived regulatory network. Genome Biol 15:502.
- 833 37. Turkarslan S, Peterson EJ, Rustad TR, Minch KJ, Reiss DJ, Morrison R, Ma S, Price  
834 ND, Sherman DR, Baliga NS. 2015. A comprehensive map of genome-wide gene  
835 regulation in Mycobacterium tuberculosis. Sci Data 2:150010.
- 836 38. Rost HL, Rosenberger G, Navarro P, Gillet L, Miladinovic SM, Schubert OT, Wolski  
837 W, Collins BC, Malmstrom J, Malmstrom L, Aebersold R. 2014. OpenSWATH  
838 enables automated, targeted analysis of data-independent acquisition MS data.  
839 Nat Biotechnol 32:219-23.
- 840 39. Schubert OT, Ludwig C, Kogadeeva M, Zimmermann M, Rosenberger G,  
841 Gengenbacher M, Gillet LC, Collins BC, Rost HL, Kaufmann SH, Sauer U,  
842 Aebersold R. 2015. Absolute Proteome Composition and Dynamics during  
843 Dormancy and Resuscitation of Mycobacterium tuberculosis. Cell Host Microbe  
844 18:96-108.
- 845 40. Schubert OT, Mouritsen J, Ludwig C, Rost HL, Rosenberger G, Arthur PK, Claassen  
846 M, Campbell DS, Sun Z, Farrah T, Gengenbacher M, Maiolica A, Kaufmann SH,

- 847 Moritz RL, Aebersold R. 2013. The Mtb proteome library: a resource of assays to  
848 quantify the complete proteome of Mycobacterium tuberculosis. *Cell Host*  
849 *Microbe* 13:602-12.
- 850 41. Choi M, Chang CY, Clough T, Broudy D, Killeen T, MacLean B, Vitek O. 2014.  
851 MSstats: an R package for statistical analysis of quantitative mass spectrometry-  
852 based proteomic experiments. *Bioinformatics* 30:2524-6.
- 853 42. Nalpas NC, Magee DA, Conlon KM, Browne JA, Healy C, McLoughlin KE, Rue-  
854 Albrecht K, McGettigan PA, Killick KE, Gormley E, Gordon SV, MacHugh DE. 2015.  
855 RNA sequencing provides exquisite insight into the manipulation of the alveolar  
856 macrophage by tubercle bacilli. *Sci Rep* 5:13629.
- 857 43. Dobin A, Davis CA, Schlesinger F, Drenkow J, Zaleski C, Jha S, Batut P, Chaisson M,  
858 Gingeras TR. 2013. STAR: ultrafast universal RNA-seq aligner. *Bioinformatics*  
859 29:15-21.
- 860 44. Robinson MD, McCarthy DJ, Smyth GK. 2010. edgeR: a Bioconductor package for  
861 differential expression analysis of digital gene expression data. *Bioinformatics*  
862 26:139-40.
- 863 45. Hochberg YBaY. 1995. Controlling the False Discovery Rate: A Practical and  
864 Powerful Approach to Multiple Testing. *Journal of the Royal Statistical Society*  
865 57:289-300.
- 866 46. Foroushani AB, Brinkman FS, Lynn DJ. 2013. Pathway-GPS and SIGORA:  
867 identifying relevant pathways based on the over-representation of their gene-  
868 pair signatures. *PeerJ* 1:e229.

- 869 47. Veyrier F, Said-Salim B, Behr MA. 2008. Evolution of the mycobacterial SigK  
870 regulon. *J Bacteriol* 190:1891-9.
- 871 48. Maier T, Guell M, Serrano L. 2009. Correlation of mRNA and protein in complex  
872 biological samples. *FEBS Lett* 583:3966-73.
- 873 49. Vogel C, Abreu Rde S, Ko D, Le SY, Shapiro BA, Burns SC, Sandhu D, Boutz DR,  
874 Marcotte EM, Penalva LO. 2010. Sequence signatures and mRNA concentration  
875 can explain two-thirds of protein abundance variation in a human cell line. *Mol*  
876 *Syst Biol* 6:400.
- 877 50. Cortes T, Schubert OT, Banaei-Esfahani A, Collins BC, Aebersold R, Young DB.  
878 2017. Delayed effects of transcriptional responses in *Mycobacterium*  
879 *tuberculosis* exposed to nitric oxide suggest other mechanisms involved in  
880 survival. *Sci Rep* 7:8208.
- 881 51. Mehta M, Rajmani RS, Singh A. 2015. *Mycobacterium tuberculosis* WhiB3  
882 responds to vacuolar pH- induced changes in mycothiol redox potential to  
883 modulate phagosomal maturation and virulence. *J Biol Chem*  
884 doi:10.1074/jbc.M115.684597.
- 885 52. Gebhard S, Humpel A, McLellan AD, Cook GM. 2008. The alternative sigma factor  
886 SigF of *Mycobacterium smegmatis* is required for survival of heat shock, acidic  
887 pH and oxidative stress. *Microbiology* 154:2786-95.
- 888 53. Singh A, Crossman DK, Mai D, Guidry L, Voskuil MI, Renfrow MB, Steyn AJ. 2009.  
889 *Mycobacterium tuberculosis* WhiB3 maintains redox homeostasis by regulating

- 890 virulence lipid anabolism to modulate macrophage response. PLoS Pathog  
891 5:e1000545.
- 892 54. Sherman DR, Voskuil M, Schnappinger D, Liao R, Harrell MI, Schoolnik GK. 2001.  
893 Regulation of the Mycobacterium tuberculosis hypoxic response gene encoding  
894 alpha -crystallin. Proc Natl Acad Sci U S A 98:7534-9.
- 895 55. Chen JM, Zhang M, Rybniker J, Basterra L, Dhar N, Tischler AD, Pojer F, Cole ST.  
896 2013. Phenotypic profiling of Mycobacterium tuberculosis EspA point mutants  
897 reveals that blockage of ESAT-6 and CFP-10 secretion in vitro does not always  
898 correlate with attenuation of virulence. J Bacteriol 195:5421-30.
- 899 56. Solans L, Aguilo N, Samper S, Pawlik A, Frigui W, Martin C, Brosch R, Gonzalo-  
900 Asensio J. 2014. A specific polymorphism in Mycobacterium tuberculosis H37Rv  
901 causes differential ESAT-6 expression and identifies WhiB6 as a novel ESX-1  
902 component. Infect Immun 82:3446-56.
- 903 57. Simeone R, Bottai D, Brosch R. 2009. ESX/type VII secretion systems and their  
904 role in host-pathogen interaction. Curr Opin Microbiol 12:4-10.
- 905 58. Goren MB. 1970. Sulfolipid I of Mycobacterium tuberculosis, strain H37Rv. I.  
906 Purification and properties. Biochim Biophys Acta 210:116-26.
- 907 59. Gonzalo Asensio J, Maia C, Ferrer NL, Barilone N, Laval F, Soto CY, Winter N,  
908 Daffe M, Gicquel B, Martin C, Jackson M. 2006. The virulence-associated two-  
909 component PhoP-PhoR system controls the biosynthesis of polyketide-derived  
910 lipids in Mycobacterium tuberculosis. J Biol Chem 281:1313-6.

- 911 60. Jain M, Petzold CJ, Schelle MW, Leavell MD, Mougous JD, Bertozzi CR, Leary JA,  
912 Cox JS. 2007. Lipidomics reveals control of *Mycobacterium tuberculosis* virulence  
913 lipids via metabolic coupling. *Proc Natl Acad Sci U S A* 104:5133-8.
- 914 61. Seeliger JC, Holsclaw CM, Schelle MW, Botyanszki Z, Gilmore SA, Tully SE,  
915 Niederweis M, Cravatt BF, Leary JA, Bertozzi CR. 2012. Elucidation and chemical  
916 modulation of sulfolipid-1 biosynthesis in *Mycobacterium tuberculosis*. *J Biol*  
917 *Chem* 287:7990-8000.
- 918 62. Yu J, Tran V, Li M, Huang X, Niu C, Wang D, Zhu J, Wang J, Gao Q, Liu J. 2012.  
919 Both phthiocerol dimycocerosates and phenolic glycolipids are required for  
920 virulence of *Mycobacterium marinum*. *Infect Immun* 80:1381-9.
- 921 63. Day TA, Mittler JE, Nixon MR, Thompson C, Miner MD, Hickey MJ, Liao RP, Pang  
922 JM, Shayakhmetov DM, Sherman DR. 2014. *Mycobacterium tuberculosis* strains  
923 lacking surface lipid phthiocerol dimycocerosate are susceptible to killing by an  
924 early innate host response. *Infect Immun* 82:5214-22.
- 925 64. Zhang L, English D, Andersen BR. 1991. Activation of human neutrophils by  
926 *Mycobacterium tuberculosis*-derived sulfolipid-1. *J Immunol* 146:2730-6.
- 927 65. Brodin P, Poquet Y, Levillain F, Peguillet I, Larrouy-Maumus G, Gilleron M, Ewann  
928 F, Christophe T, Fenistein D, Jang J, Jang MS, Park SJ, Rauzier J, Carralot JP,  
929 Shrimpton R, Genovesio A, Gonzalo-Asensio JA, Puzo G, Martin C, Brosch R,  
930 Stewart GR, Gicquel B, Neyrolles O. 2010. High content phenotypic cell-based  
931 visual screen identifies *Mycobacterium tuberculosis* acyltrehalose-containing  
932 glycolipids involved in phagosome remodeling. *PLoS Pathog* 6:e1001100.

- 933 66. Rousseau C, Winter N, Pivert E, Bordat Y, Neyrolles O, Ave P, Huerre M, Gicquel  
934 B, Jackson M. 2004. Production of phthiocerol dimycocerosates protects  
935 *Mycobacterium tuberculosis* from the cidal activity of reactive nitrogen  
936 intermediates produced by macrophages and modulates the early immune  
937 response to infection. *Cell Microbiol* 6:277-87.
- 938 67. Astarie-Dequeker C, Le Guyader L, Malaga W, Seaphanh FK, Chalut C, Lopez A,  
939 Guilhot C. 2009. Phthiocerol dimycocerosates of *M. tuberculosis* participate in  
940 macrophage invasion by inducing changes in the organization of plasma  
941 membrane lipids. *PLoS Pathog* 5:e1000289.
- 942 68. Simeone R, Bobard A, Lippmann J, Bitter W, Majlessi L, Brosch R, Enninga J. 2012.  
943 Phagosomal rupture by *Mycobacterium tuberculosis* results in toxicity and host  
944 cell death. *PLoS Pathog* 8:e1002507.
- 945 69. Simeone R, Bottai D, Frigui W, Majlessi L, Brosch R. 2015. ESX/type VII secretion  
946 systems of mycobacteria: Insights into evolution, pathogenicity and protection.  
947 *Tuberculosis (Edinb)* 95 Suppl 1:S150-4.
- 948 70. Chim N, Johnson PM, Goulding CW. 2014. Insights into redox sensing  
949 metalloproteins in *Mycobacterium tuberculosis*. *J Inorg Biochem* 133:118-26.
- 950 71. Cao G, Howard ST, Zhang P, Wang X, Chen XL, Samten B, Pang X. 2015. EspR, a  
951 regulator of the ESX-1 secretion system in *Mycobacterium tuberculosis*, is  
952 directly regulated by the two-component systems MprAB and PhoPR.  
953 *Microbiology* 161:477-89.

- 954 72. Bullard JH, Purdom E, Hansen KD, Dudoit S. 2010. Evaluation of statistical  
955 methods for normalization and differential expression in mRNA-Seq  
956 experiments. *BMC Bioinformatics* 11:94.
- 957 73. Tarazona S, Garcia-Alcalde F, Dopazo J, Ferrer A, Conesa A. 2011. Differential  
958 expression in RNA-seq: a matter of depth. *Genome Res* 21:2213-23.
- 959 74. Rue-Albrecht K, Magee DA, Killick KE, Nalpas NC, Gordon SV, MacHugh DE. 2014.  
960 Comparative functional genomics and the bovine macrophage response to  
961 strains of the mycobacterium genus. *Front Immunol* 5:536.
- 962 75. Rivero-Lezcano OM, Gonzalez-Cortes C, Reyes-Ruvalcaba D, Diez-Tascon C. 2010.  
963 CCL20 is overexpressed in Mycobacterium tuberculosis-infected monocytes and  
964 inhibits the production of reactive oxygen species (ROS). *Clin Exp Immunol*  
965 162:289-97.
- 966 76. Robinson CM, Jung JY, Nau GJ. 2012. Interferon-gamma, tumor necrosis factor,  
967 and interleukin-18 cooperate to control growth of Mycobacterium tuberculosis  
968 in human macrophages. *Cytokine* 60:233-41.
- 969 77. Lee SH, Choi IH, Jeon YK, Park SJ, Lee HK, Lee YM, Chang CL, Kim YS, Lee MK, Park  
970 SK. 2011. Association between the interleukin-18 promoter polymorphism and  
971 pulmonary tuberculosis in a Korean population. *Int J Tuberc Lung Dis* 15:1246-51,  
972 i.
- 973 78. Han M, Yue J, Lian YY, Zhao YL, Wang HX, Liu LR. 2011. Relationship between  
974 single nucleotide polymorphism of interleukin-18 and susceptibility to

- 975 pulmonary tuberculosis in the Chinese Han population. *Microbiol Immunol*
- 976 55:388-93.
- 977 79. Redford PS, Murray PJ, O'Garra A. 2011. The role of IL-10 in immune regulation
- 978 during *M. tuberculosis* infection. *Mucosal Immunol* 4:261-70.
- 979 80. Cheng Y, Huang C, Tsai HJ. 2016. Relationship of bovine NOS2 gene
- 980 polymorphisms to the risk of bovine tuberculosis in Holstein cattle. *J Vet Med Sci*
- 981 78:281-6.
- 982 81. Kelly B, O'Neill LA. 2015. Metabolic reprogramming in macrophages and
- 983 dendritic cells in innate immunity. *Cell Res* 25:771-84.
- 984 82. Lovewell RR, Sasseti CM, VanderVen BC. 2016. Chewing the fat: lipid
- 985 metabolism and homeostasis during *M. tuberculosis* infection. *Curr Opin*
- 986 *Microbiol* 29:30-6.
- 987 83. Collins AC, Cai H, Li T, Franco LH, Li XD, Nair VR, Scharn CR, Stamm CE, Levine B,
- 988 Chen ZJ, Shiloh MU. 2015. Cyclic GMP-AMP Synthase Is an Innate Immune DNA
- 989 Sensor for *Mycobacterium tuberculosis*. *Cell Host Microbe* 17:820-8.
- 990 84. Dey B, Dey RJ, Cheung LS, Pokkali S, Guo H, Lee JH, Bishai WR. 2015. A bacterial
- 991 cyclic dinucleotide activates the cytosolic surveillance pathway and mediates
- 992 innate resistance to tuberculosis. *Nat Med* 21:401-6.
- 993 85. Wassermann R, Gulen MF, Sala C, Perin SG, Lou Y, Rybniker J, Schmid-Burgk JL,
- 994 Schmidt T, Hornung V, Cole ST, Ablasser A. 2015. *Mycobacterium tuberculosis*
- 995 Differentially Activates cGAS- and Inflammasome-Dependent Intracellular
- 996 Immune Responses through ESX-1. *Cell Host Microbe* 17:799-810.



- 997 86. Watson RO, Bell SL, MacDuff DA, Kimmey JM, Diner EJ, Olivas J, Vance RE,  
998 Stallings CL, Virgin HW, Cox JS. 2015. The Cytosolic Sensor cGAS Detects  
999 Mycobacterium tuberculosis DNA to Induce Type I Interferons and Activate  
1000 Autophagy. *Cell Host Microbe* 17:811-9.
- 1001 87. Kato H, Oh SW, Fujita T. 2017. RIG-I-Like Receptors and Type I  
1002 Interferonopathies. *J Interferon Cytokine Res* 37:207-213.
- 1003 88. Keating SE, Baran M, Bowie AG. 2011. Cytosolic DNA sensors regulating type I  
1004 interferon induction. *Trends Immunol* 32:574-81.
- 1005 89. Zevini A, Olganier D, Hiscott J. 2017. Crosstalk between Cytoplasmic RIG-I and  
1006 STING Sensing Pathways. *Trends Immunol* 38:194-205.
- 1007 90. Komuro A, Bamming D, Horvath CM. 2008. Negative regulation of cytoplasmic  
1008 RNA-mediated antiviral signaling. *Cytokine* 43:350-8.
- 1009 91. Yan N, Regalado-Magdos AD, Stiggelbout B, Lee-Kirsch MA, Lieberman J. 2010.  
1010 The cytosolic exonuclease TREX1 inhibits the innate immune response to human  
1011 immunodeficiency virus type 1. *Nat Immunol* 11:1005-13.
- 1012 92. Chakrabarti A, Banerjee S, Franchi L, Loo YM, Gale M, Jr., Nunez G, Silverman RH.  
1013 2015. RNase L activates the NLRP3 inflammasome during viral infections. *Cell*  
1014 *Host Microbe* 17:466-77.
- 1015 93. Ting JP, Duncan JA, Lei Y. 2010. How the noninflammasome NLRs function in the  
1016 innate immune system. *Science* 327:286-90.

- 1017 94. Vigano E, Diamond CE, Spreafico R, Balachander A, Sobota RM, Mortellaro A.  
1018 2015. Human caspase-4 and caspase-5 regulate the one-step non-canonical  
1019 inflammasome activation in monocytes. *Nat Commun* 6:8761.
- 1020 95. Schmid-Burgk JL, Gaidt MM, Schmidt T, Ebert TS, Bartok E, Hornung V. 2015.  
1021 Caspase-4 mediates non-canonical activation of the NLRP3 inflammasome in  
1022 human myeloid cells. *Eur J Immunol* 45:2911-7.
- 1023 96. Beltran PK, Gutierrez-Ortega A, Puebla-Perez AM, Gutierrez-Pabello JA, Flores-  
1024 Valdez MA, Hernandez-Gutierrez R, Martinez-Velazquez M, Alvarez AH. 2011.  
1025 Identification of immunodominant antigens of *Mycobacterium bovis* by  
1026 expression library immunization. *Vet J* 190:181-3.
- 1027 97. Zheng J, Liu L, Wei C, Leng W, Yang J, Li W, Wang J, Jin Q. 2012. A comprehensive  
1028 proteomic analysis of *Mycobacterium bovis* bacillus Calmette-Guerin using high  
1029 resolution Fourier transform mass spectrometry. *J Proteomics* 77:357-71.
- 1030 98. Westermann AJ, Barquist L, Vogel J. 2017. Resolving host-pathogen interactions  
1031 by dual RNA-seq. *PLoS Pathog* 13:e1006033.
- 1032 99. Arbues A, Lugo-Villarino G, Neyrolles O, Guilhot C, Astarie-Dequeker C. 2014.  
1033 Playing hide-and-seek with host macrophages through the use of mycobacterial  
1034 cell envelope phthiocerol dimycocerosates and phenolic glycolipids. *Front Cell  
1035 Infect Microbiol* 4:173.
- 1036 100. Solans L, Uranga S, Aguilo N, Arnal C, Gomez AB, Monzon M, Badiola JJ, Gicquel  
1037 B, Martin C. 2014. Hyper-attenuated MTBVAC erp mutant protects against  
1038 tuberculosis in mice. *Vaccine* 32:5192-7.

- 1039 101. Spertini F, Audran R, Chakour R, Karoui O, Steiner-Monard V, Thierry AC, Mayor  
1040 CE, Rettby N, Jatou K, Vallotton L, Lazor-Blanchet C, Doce J, Puentes E, Marinova  
1041 D, Aguilo N, Martin C. 2015. Safety of human immunisation with a live-  
1042 attenuated *Mycobacterium tuberculosis* vaccine: a randomised, double-blind,  
1043 controlled phase I trial. *Lancet Respir Med* 3:953-62.
- 1044 102. Walters SB, Dubnau E, Kolesnikova I, Laval F, Daffe M, Smith I. 2006. The  
1045 *Mycobacterium tuberculosis* PhoPR two-component system regulates genes  
1046 essential for virulence and complex lipid biosynthesis. *Mol Microbiol* 60:312-30.
- 1047 103. Frigui W, Bottai D, Majlessi L, Monot M, Josselin E, Brodin P, Garnier T, Gicquel B,  
1048 Martin C, Leclerc C, Cole ST, Brosch R. 2008. Control of *M. tuberculosis* ESAT-6  
1049 secretion and specific T cell recognition by PhoP. *PLoS Pathog* 4:e33.
- 1050 104. Mendoza Lopez P, Golby P, Wooff E, Nunez Garcia J, Garcia Pelayo MC, Conlon K,  
1051 Gema Camacho A, Hewinson RG, Polaina J, Suarez Garcia A, Gordon SV. 2010.  
1052 Characterization of the transcriptional regulator Rv3124 of *Mycobacterium*  
1053 *tuberculosis* identifies it as a positive regulator of molybdopterin biosynthesis  
1054 and defines the functional consequences of a non-synonymous SNP in the  
1055 *Mycobacterium bovis* BCG orthologue. *Microbiology* 156:2112-23.
- 1056 105. Soto CY, Menendez MC, Perez E, Samper S, Gomez AB, Garcia MJ, Martin C.  
1057 2004. IS6110 mediates increased transcription of the *phoP* virulence gene in a  
1058 multidrug-resistant clinical isolate responsible for tuberculosis outbreaks. *J Clin*  
1059 *Microbiol* 42:212-9.

- 1060 106. Simeone R, Sayes F, Song O, Groschel MI, Brodin P, Brosch R, Majlessi L. 2015.  
1061 Cytosolic access of Mycobacterium tuberculosis: critical impact of phagosomal  
1062 acidification control and demonstration of occurrence in vivo. PLoS Pathog  
1063 11:e1004650.
- 1064 107. Burckstummer T, Baumann C, Bluml S, Dixit E, Durnberger G, Jahn H, Planyavsky  
1065 M, Bilban M, Colinge J, Bennett KL, Superti-Furga G. 2009. An orthogonal  
1066 proteomic-genomic screen identifies AIM2 as a cytoplasmic DNA sensor for the  
1067 inflammasome. Nat Immunol 10:266-72.
- 1068 108. Fernandes-Alnemri T, Yu JW, Datta P, Wu J, Alnemri ES. 2009. AIM2 activates the  
1069 inflammasome and cell death in response to cytoplasmic DNA. Nature 458:509-  
1070 13.
- 1071 109. Unterholzner L, Keating SE, Baran M, Horan KA, Jensen SB, Sharma S, Sirois CM,  
1072 Jin T, Latz E, Xiao TS, Fitzgerald KA, Paludan SR, Bowie AG. 2010. IFI16 is an  
1073 innate immune sensor for intracellular DNA. Nat Immunol 11:997-1004.
- 1074 110. Ishikawa H, Barber GN. 2008. STING is an endoplasmic reticulum adaptor that  
1075 facilitates innate immune signalling. Nature 455:674-8.
- 1076 111. Yoneyama M, Kikuchi M, Matsumoto K, Imaizumi T, Miyagishi M, Taira K, Foy E,  
1077 Loo YM, Gale M, Jr., Akira S, Yonehara S, Kato A, Fujita T. 2005. Shared and  
1078 unique functions of the DExD/H-box helicases RIG-I, MDA5, and LGP2 in antiviral  
1079 innate immunity. J Immunol 175:2851-8.

- 1080 112. Connolly DJ, Bowie AG. 2014. The emerging role of human PYHIN proteins in  
1081 innate immunity: implications for health and disease. *Biochem Pharmacol*  
1082 92:405-14.
- 1083 113. Dorhoi A, Nouailles G, Jorg S, Hagens K, Heinemann E, Pradl L, Oberbeck-Muller  
1084 D, Duque-Correa MA, Reece ST, Ruland J, Brosch R, Tschopp J, Gross O,  
1085 Kaufmann SH. 2012. Activation of the NLRP3 inflammasome by *Mycobacterium*  
1086 tuberculosis is uncoupled from susceptibility to active tuberculosis. *Eur J*  
1087 *Immunol* 42:374-84.
- 1088 114. Wong KW, Jacobs WR, Jr. 2011. Critical role for NLRP3 in necrotic death triggered  
1089 by *Mycobacterium tuberculosis*. *Cell Microbiol* 13:1371-84.
- 1090 115. Groschel MI, Sayes F, Shin SJ, Frigui W, Pawlik A, Orgeur M, Canetti R, Honore N,  
1091 Simeone R, van der Werf TS, Bitter W, Cho SN, Majlessi L, Brosch R. 2017.  
1092 Recombinant BCG Expressing ESX-1 of *Mycobacterium marinum* Combines Low  
1093 Virulence with Cytosolic Immune Signaling and Improved TB Protection. *Cell Rep*  
1094 18:2752-2765.
- 1095 116. Mishra BB, Moura-Alves P, Sonawane A, Hacoheh N, Griffiths G, Moita LF, Anes  
1096 E. 2010. *Mycobacterium tuberculosis* protein ESAT-6 is a potent activator of the  
1097 NLRP3/ASC inflammasome. *Cell Microbiol* 12:1046-63.
- 1098 117. Maji A, Misra R, Kumar Mondal A, Kumar D, Bajaj D, Singhal A, Arora G, Bhaduri  
1099 A, Sajid A, Bhatia S, Singh S, Singh H, Rao V, Dash D, Baby Shalini E, Sarojini  
1100 Michael J, Chaudhary A, Gokhale RS, Singh Y. 2015. Expression profiling of lymph

- 1101 nodes in tuberculosis patients reveal inflammatory milieu at site of infection. *Sci*  
1102 *Rep* 5:15214.
- 1103 118. Casson CN, Yu J, Reyes VM, Taschuk FO, Yadav A, Copenhaver AM, Nguyen HT,  
1104 Collman RG, Shin S. 2015. Human caspase-4 mediates noncanonical  
1105 inflammasome activation against gram-negative bacterial pathogens. *Proc Natl*  
1106 *Acad Sci U S A* 112:6688-93.
- 1107 119. Dutta NK, Illei PB, Jain SK, Karakousis PC. 2014. Characterization of a novel  
1108 necrotic granuloma model of latent tuberculosis infection and reactivation in  
1109 mice. *Am J Pathol* 184:2045-55.
- 1110 120. Wiens KE, Ernst JD. 2016. The Mechanism for Type I Interferon Induction by  
1111 *Mycobacterium tuberculosis* is Bacterial Strain-Dependent. *PLoS Pathog*  
1112 12:e1005809.
- 1113 121. Bryant CE, Monie TP. 2012. Mice, men and the relatives: cross-species studies  
1114 underpin innate immunity. *Open Biol* 2:120015.
- 1115 122. Brunette RL, Young JM, Whitley DG, Brodsky IE, Malik HS, Stetson DB. 2012.  
1116 Extensive evolutionary and functional diversity among mammalian AIM2-like  
1117 receptors. *J Exp Med* 209:1969-83.
- 1118 123. Eklund D, Welin A, Andersson H, Verma D, Soderkvist P, Stendahl O, Sarndahl E,  
1119 Lerm M. 2014. Human gene variants linked to enhanced NLRP3 activity limit  
1120 intramacrophage growth of *Mycobacterium tuberculosis*. *J Infect Dis* 209:749-53.
- 1121 124. Said-Salim B, Mostowy S, Kristof AS, Behr MA. 2006. Mutations in  
1122 *Mycobacterium tuberculosis* Rv0444c, the gene encoding anti-SigK, explain high

1123 level expression of MPB70 and MPB83 in Mycobacterium bovis. Mol Microbiol  
1124 62:1251-63.

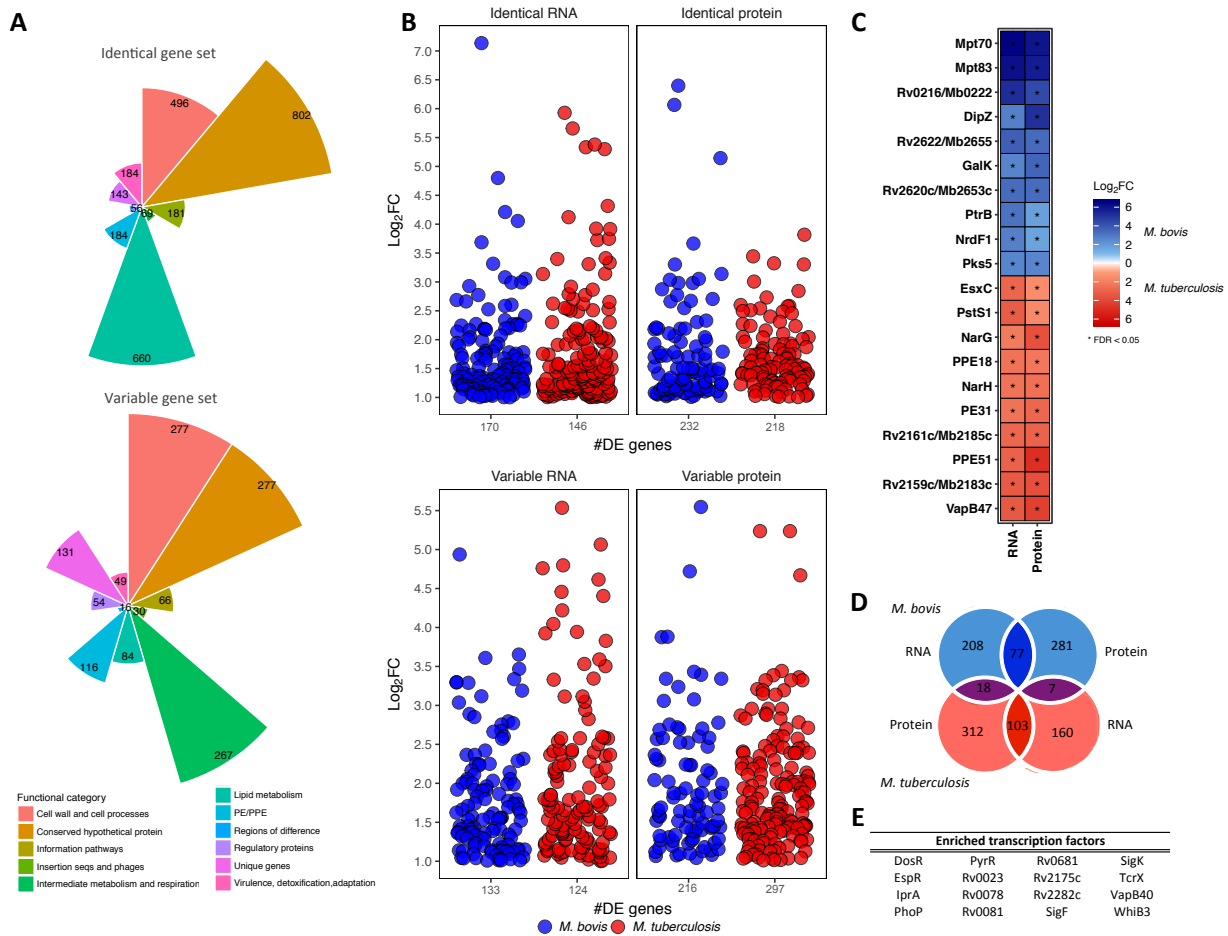

**Figure 1: A)** The number of genes from *M. bovis* AF2122/97 and *M. tuberculosis* H37Rv classified as either “Identical” (100% conserved in length and amino acid sequence, top plot) or Variable (all other orthologous genes, bottom plot). Colours represent the various gene categories to which each gene belongs. **B)** The level of expression ( $\text{Log}_2\text{FC}$ ) of Identical genes (top panel) and Variable genes (bottom panel) that are differentially expressed ( $|\text{Log}_2\text{FC}| > 1$ , FDR < 0.05) and upregulated in either *M. bovis* (blue) or *M. tuberculosis* (red) at both the RNA and protein level. The number of genes in each category is indicated on the x-axis (“#DE genes”). **C)** The top 20 differentially expressed genes at the RNA and protein level ( $|\text{Log}_2\text{FC}| > 1$ , FDR < 0.05 (\*\*)) that are upregulated in *M. bovis* (blue) or *M. tuberculosis* (red). **D)** The overlap of



genes that are upregulated in either *M. bovis* (blue) or *M. tuberculosis* (red) at the RNA and protein level. Dark blue overlap represents those genes upregulated in *M. bovis* only, dark red overlap represents those genes upregulated in *M. tuberculosis* while purple overlaps represent those genes that show discordant expression patterns at the RNA and protein level between the two species. **E**) The transcription factors enriched for Identical genes (100% conserved in length and amino acid sequence between the two species) that are differentially expressed between *M. bovis* and *M. tuberculosis*. (Rand Index,  $P < 0.01$ ).

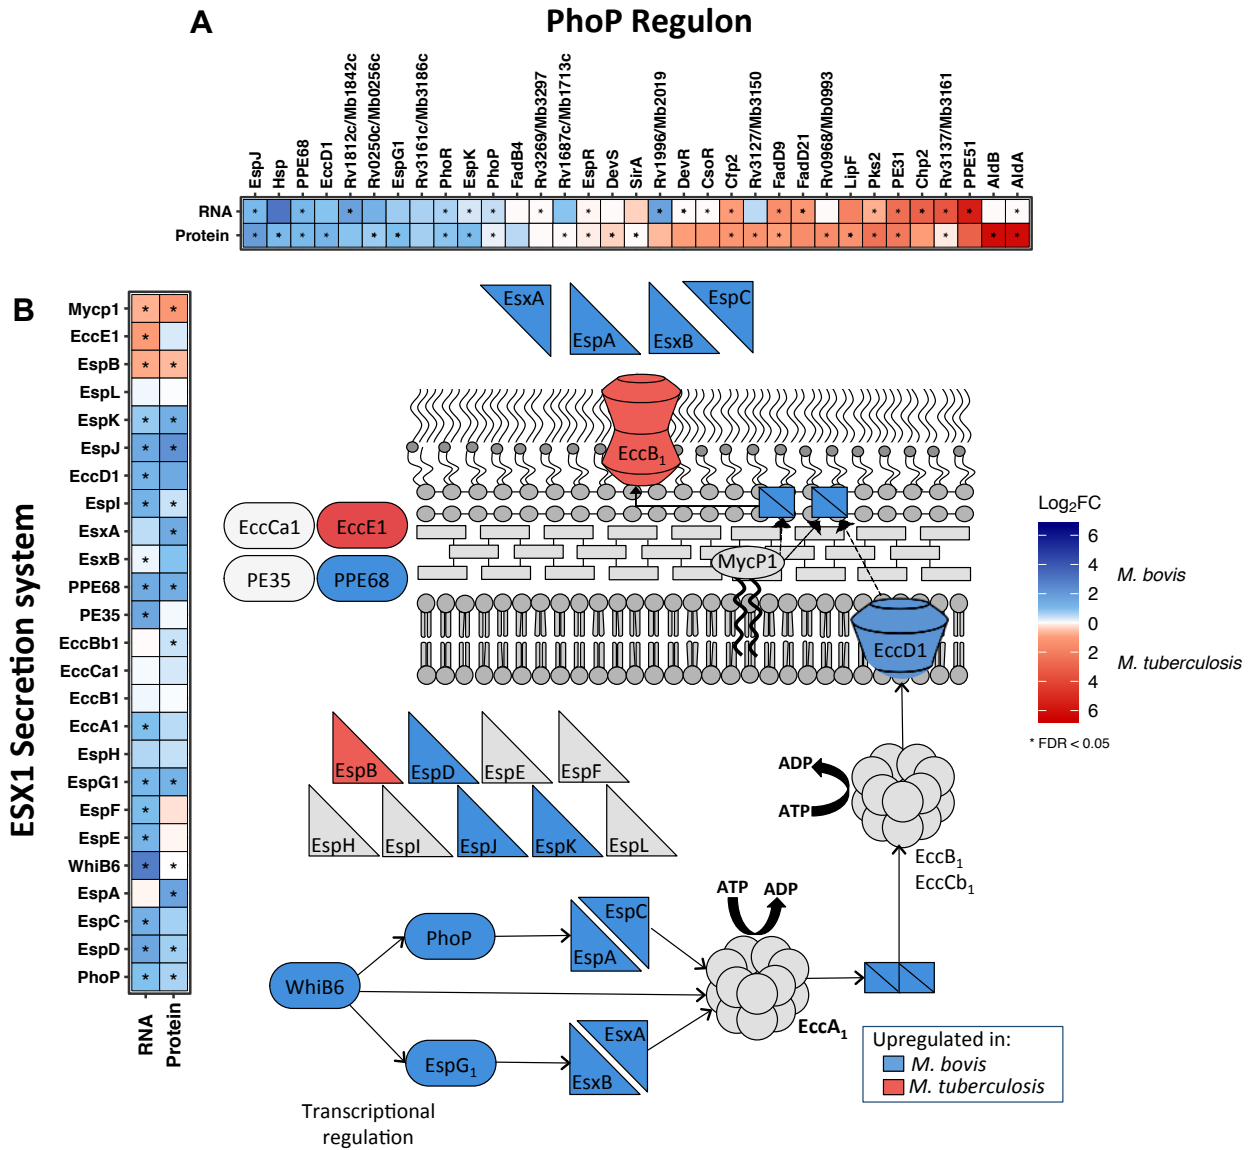

**Figure 2:** The differentially expressed genes ( $|\text{Log}_2\text{FC}| > 1$ ,  $\text{FDR} < 0.05$  (“\*”)) belonging to **A**) the PhoP regulon and **B**) the ESX-1 secretion system that are upregulated in *M. bovis* (blue) or *M. tuberculosis* (red). Inset is a representation of the ESX-1 secretion system pathway of *M. tuberculosis* coloured according to the upregulation of the associated gene in *M. bovis* (blue) or *M. tuberculosis* (red).

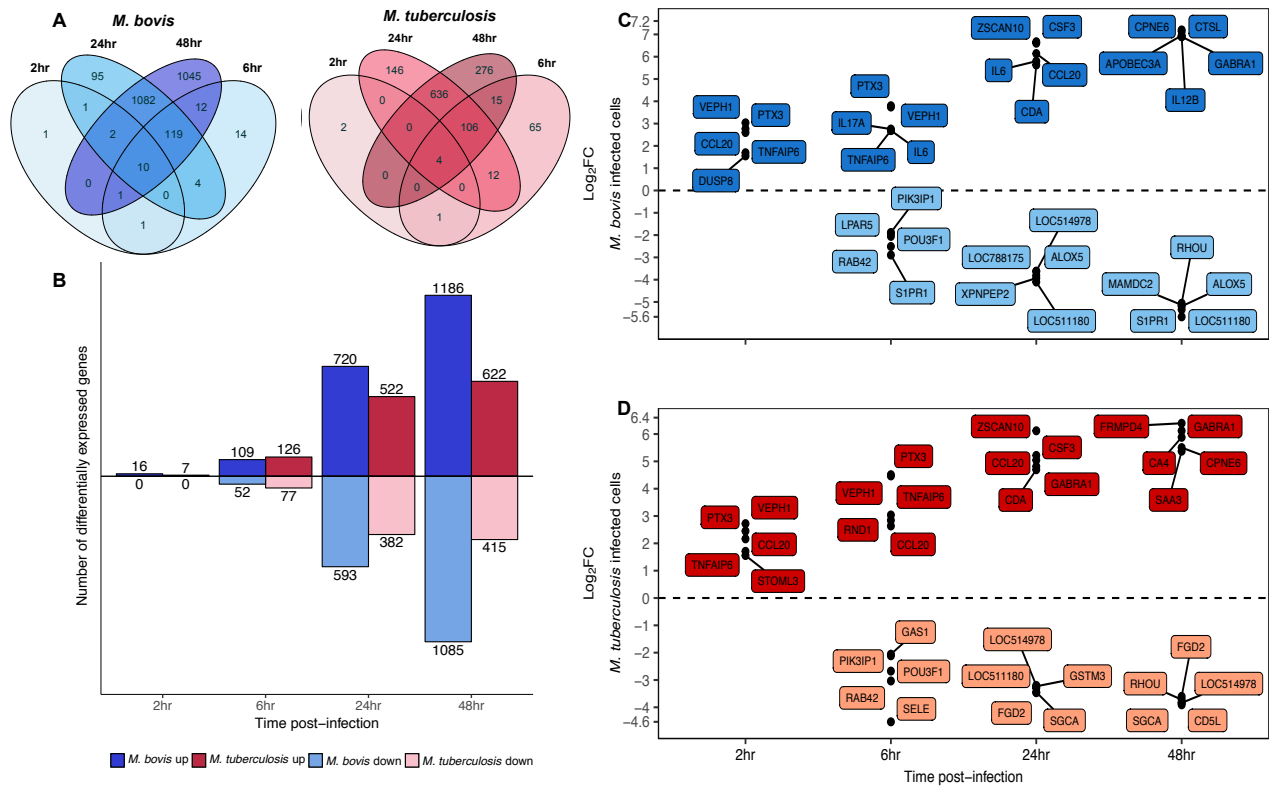

**Figure 3: A)** The differentially expressed genes ( $|\text{Log}_2\text{FC}| > 1$ ,  $\text{FDR} < 0.05$ ) of bovine alveolar macrophages infected with *M. bovis* (blue) or *M. tuberculosis* (red) at 2, 6, 24 and 48 hours post-infection. **B)** The number (y-axis) and direction of change (up = positive y-space, down = negative y-space) of differentially expressed genes ( $|\text{Log}_2\text{FC}| > 1$ ,  $\text{FDR} < 0.05$ ) of bovine alveolar macrophages infected with *M. bovis* (blue) or *M. tuberculosis* (red) at 2, 6, 24 and 48 hours post-infection (x-axis). **C)** The top 5 upregulated (positive y-space) and 5 downregulated (negative y-space) differentially expressed genes ( $|\text{Log}_2\text{FC}| > 1$ ,  $\text{FDR} < 0.05$ ) of bovine alveolar macrophages infected with *M. bovis* or **D)** *M. tuberculosis* at 2, 6, 24 and 48 hours post-infection (x-axis).

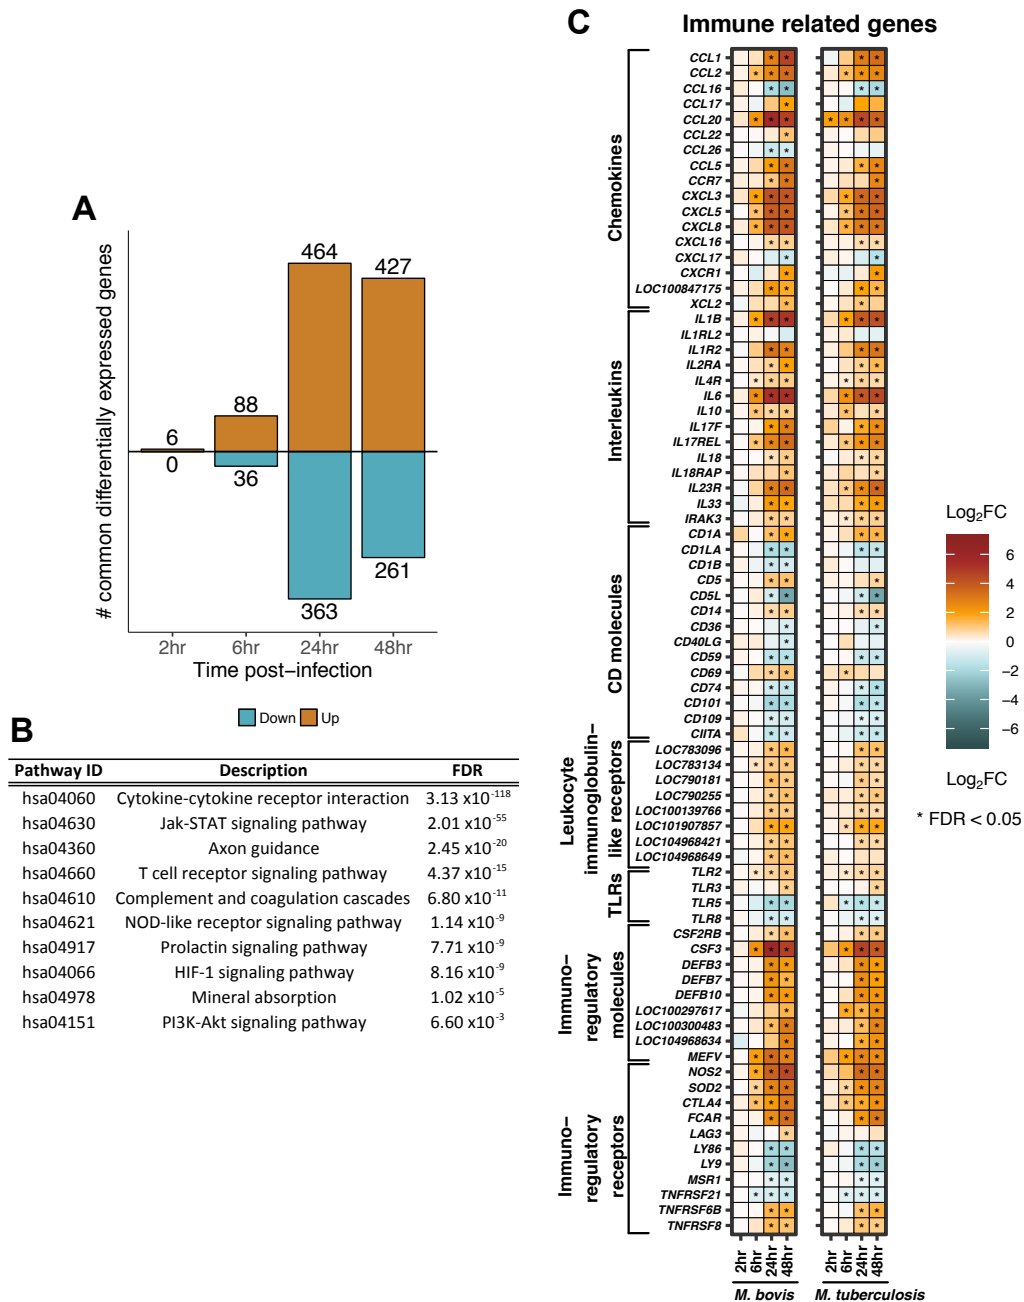

**Figure 4: A)** The number (y-axis) and direction of change (up = orange, down = cyan) of genes that are commonly differentially expressed (“core response”) ( $|\text{Log}_2\text{FC}| > 1$ , FDR < 0.05, with non-significant delta comparison values) in bovine alveolar macrophages infected with *M. bovis* and infected with *M. tuberculosis* at 2, 6, 24 and 48 hours post-infection. **B)** Pathways enriched for 688 genes that are commonly differentially expressed (“core response”) in bovine alveolar

macrophages infected with *M. bovis* and *M. tuberculosis* over the first 24 hours of infection (FDR < 0.05). **C**) Genes that are commonly differentially expressed (“core response”) ( $|\text{Log}_2\text{FC}| > 1$ , FDR < 0.05 (\*\*)) and associated with the innate immune response in bovine alveolar macrophages infected with *M. bovis* (left column) or *M. tuberculosis* (right column) over 48 hours post-infection.

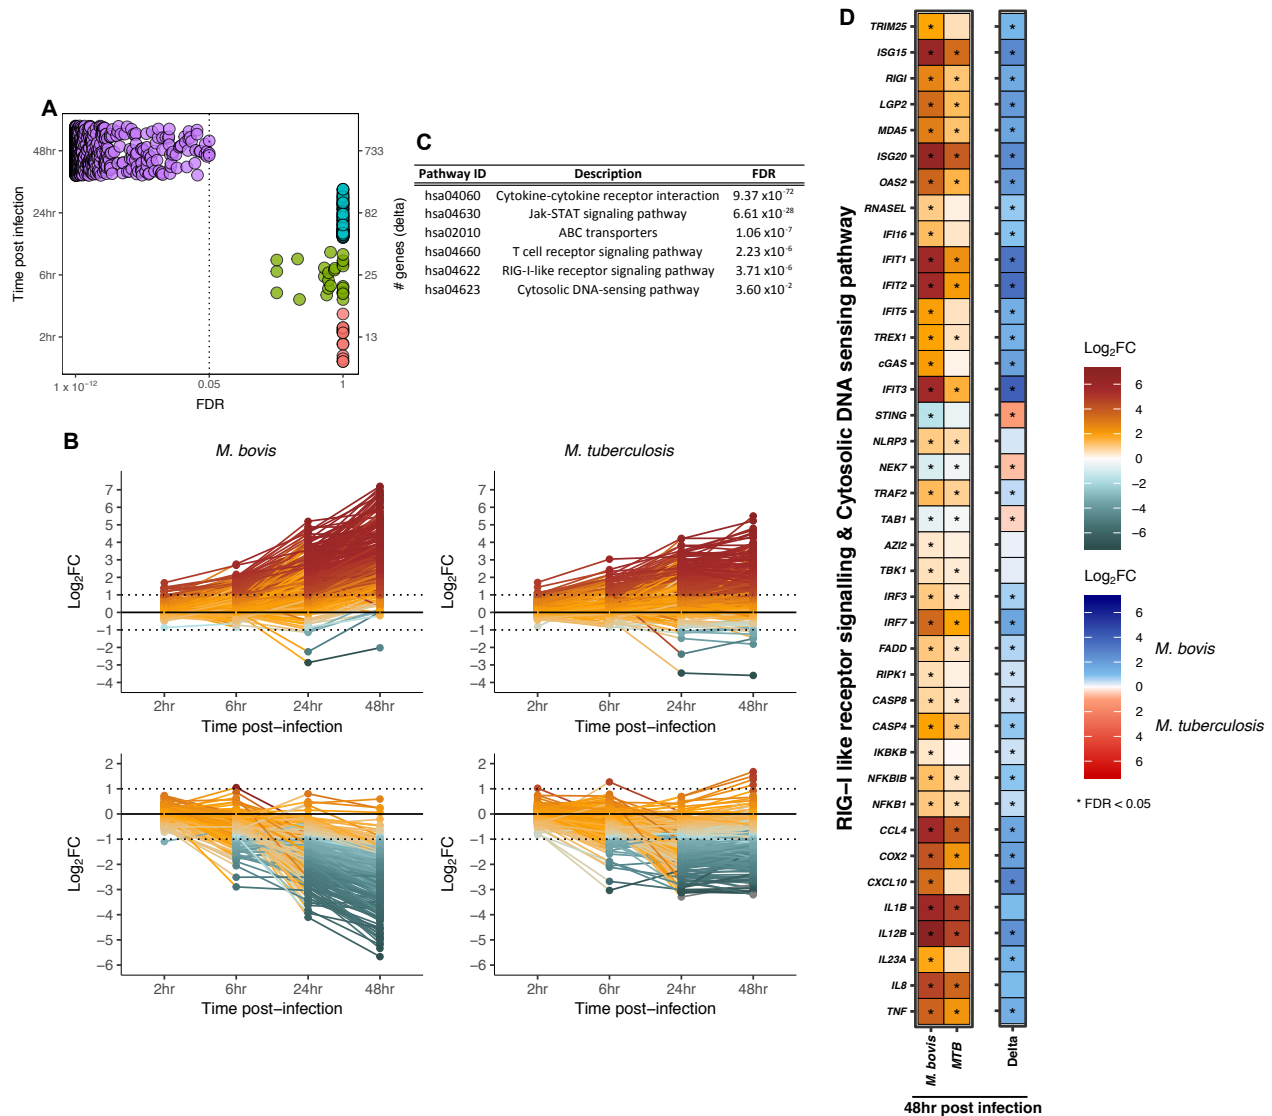

respectively) and in a negative manner ( $n = 253$ ) (left and right bottom panel respectively) at 2, 4, 24 and 48 hours post-infection. **C)** Pathways that are enriched for 576 functionally annotated genes that exhibit divergent expression patterns in *M. bovis*- or *M. tuberculosis*-infected macrophages at 48 hours post-infection (FDR < 0.05). **D)** The differentially expressed genes ( $|\text{Log}_2\text{FC}| > 1$ , FDR < 0.05) associated with *RIG-I*-like and *DNA sensing signalling* pathways in bovine alveolar macrophages infected with *M. bovis* (blue) or *M. tuberculosis* (red) at 48 hours post-infection.

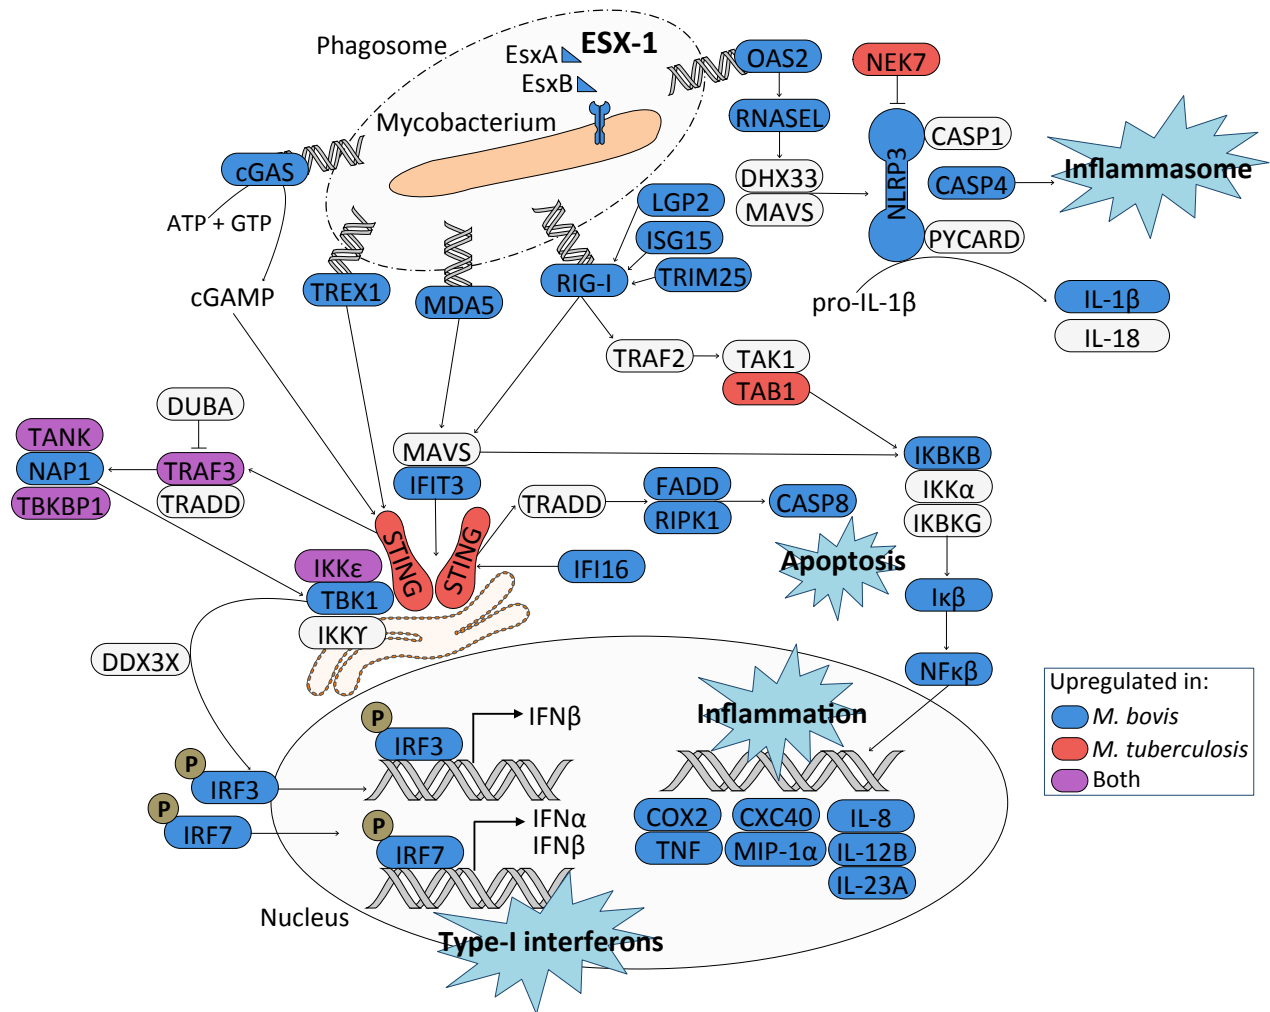

**Figure 6:** An overview of the DNA sensing and RIG-I signaling identified in this study 48 hours after infection of bovine alveolar macrophages with *M. bovis* and *M. tuberculosis*. Blue and red represents upregulation of the associated gene in either *M. bovis*- or *M. tuberculosis*-infected macrophages while purple represents upregulation of the associated gene in both infection models. The ESX-1 secretion system was found upregulated in *M. bovis* in comparison to *M. tuberculosis*.





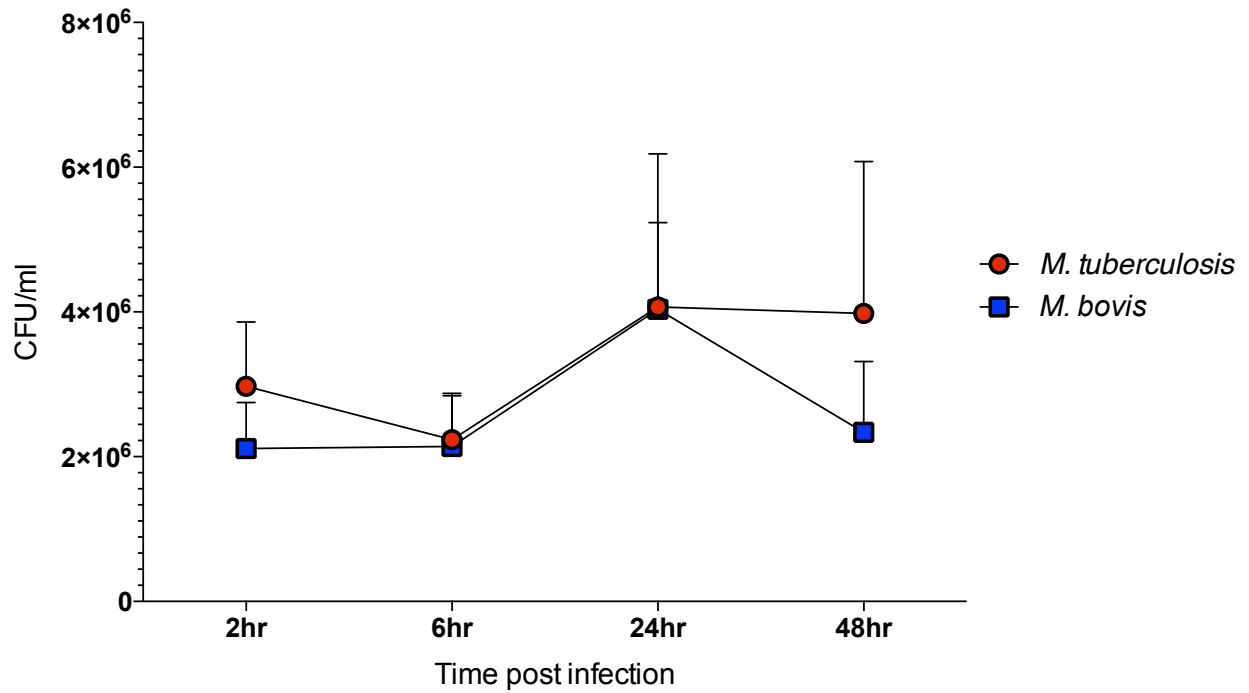

**Figure S1:** The number of colony forming units ('CFU/ml') recovered from bovine alveolar macrophages infected with *M. bovis* (blue) or *M. tuberculosis* (red) at 2, 6, 24 and 48 hours post-infection. (Error bars represent standard error of the mean,  $n = 6$ )

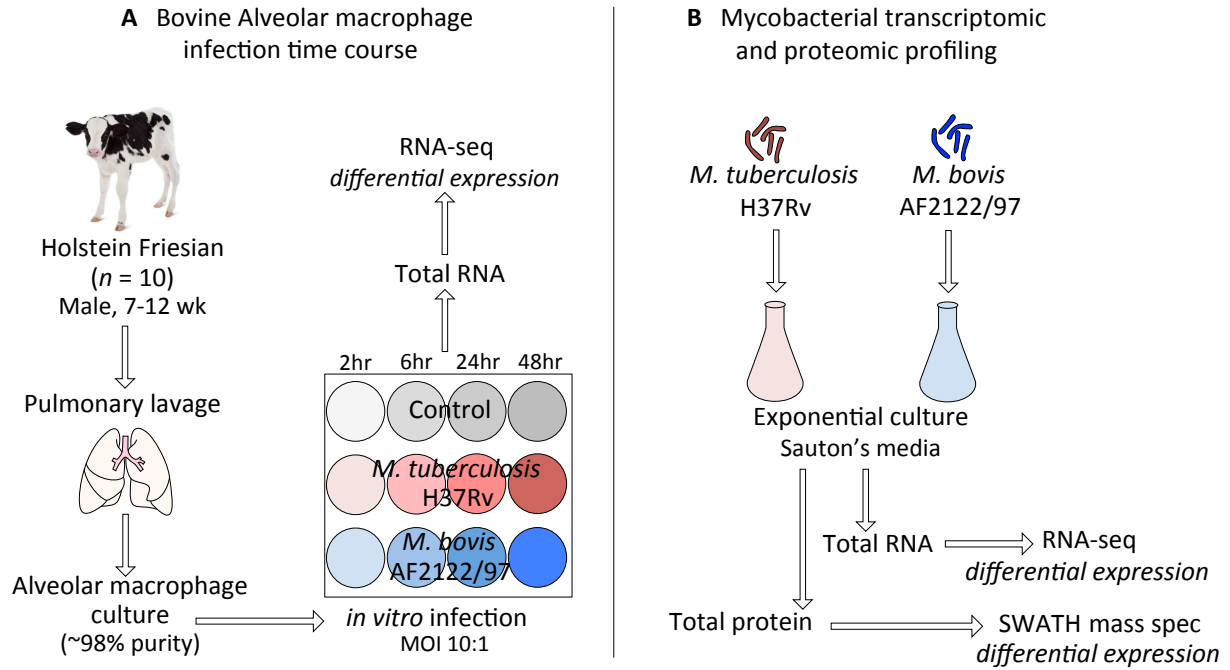

**Figure S2:** Overview of experimental design for the **A)** bovine alveolar macrophage infection time course and **B)** mycobacterial transcriptomic and proteomic profiling performed for this study.

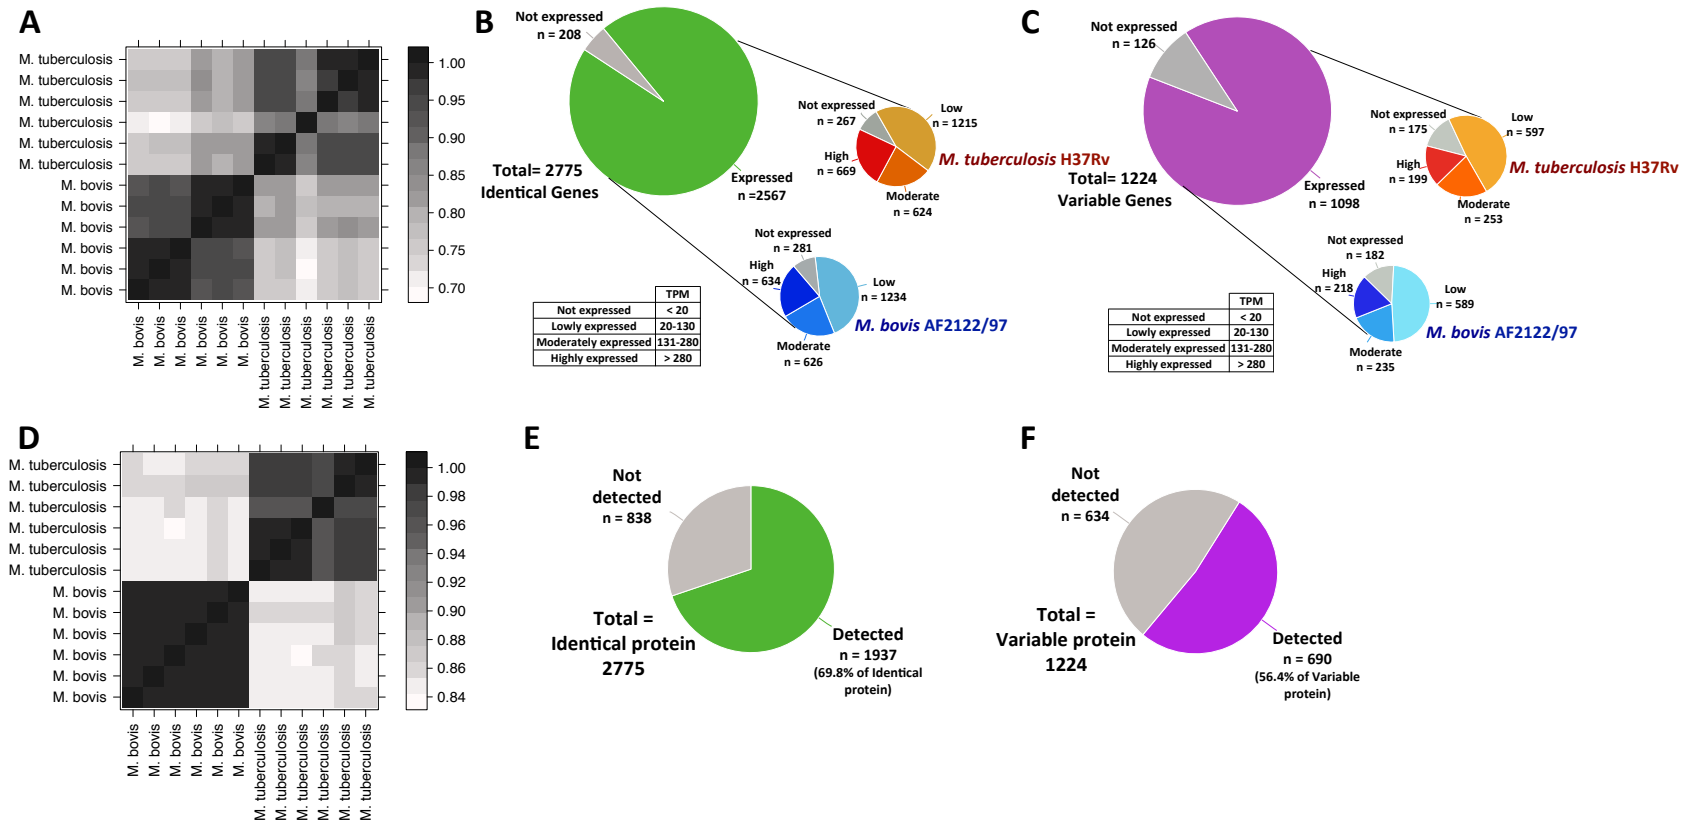

**Figure S3: A)** Pearson correlation plot of reads mapped to 2,775 Identical genes (100% conserved in length and amino acid sequence between the two species) in the six *M. bovis* and six *M. tuberculosis* RNA-seq datasets. Pie charts representing the proportion of **B)** Identical (100% conserved in length and amino acid sequence between the two species, green) and **C)** Variable genes (< 100% conserved in length and amino acid sequence between the two species, purple) detected and not detected across *M. bovis* and *M. tuberculosis* RNA-seq datasets. RNA expression values (Transcripts per Million (TPM)) were calculated for each gene and gene

expression within either species was categorised into not expressed (<20 TPM), lowly expressed (20-130 TPM), moderately expressed (131-280 TPM) and highly expressed (>280 TPM). **D)** Pearson correlation plot of the intensity values of the 2,627 identified proteins in the six *M. bovis* and six *M. tuberculosis* SWATH MS datasets. Pie charts representing the expression of **E)** 2775 Identical genes (100% conserved in length and amino acid sequence) and **F)** 1224 Variable genes (< 100% conserved in length and amino acid) in *M. bovis* and *M. tuberculosis* detected by SWATH MS.

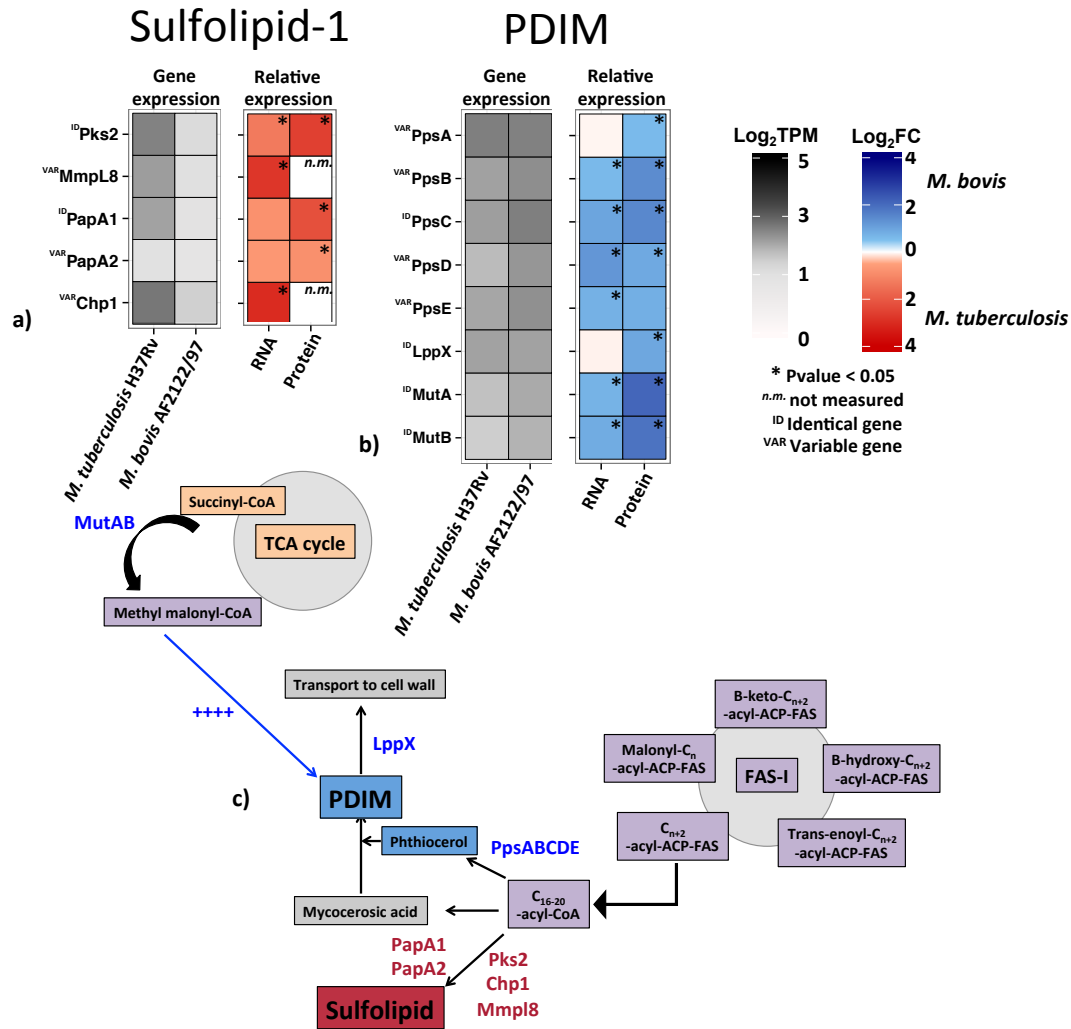

**Figure S4:** The expression of the **a)** sulfolipid-1 (SL-1) and **b)** phthiocerol dimycoerolate (PDIM) synthesis associated genes at the RNA and protein level in *M. tuberculosis* (red) and *M. bovis* (blue). The expression of each gene (“Gene expression”) is presented as Log<sub>10</sub>TPM at the RNA level while the relative expression (“Relative expression”) between the two species is presented as log<sub>2</sub>FC. Those genes that change significantly at the RNA and protein level (FDR < 0.05) are denoted (“\*”). **c)** Diagrammatic overview of the SL-1 and PDIM biosynthesis pathways in *M. tuberculosis*. Blue represents the genes in b) that are upregulated in *M. bovis* in contrast to *M. tuberculosis* and red represents the genes in a) that are upregulated in *M. tuberculosis*.

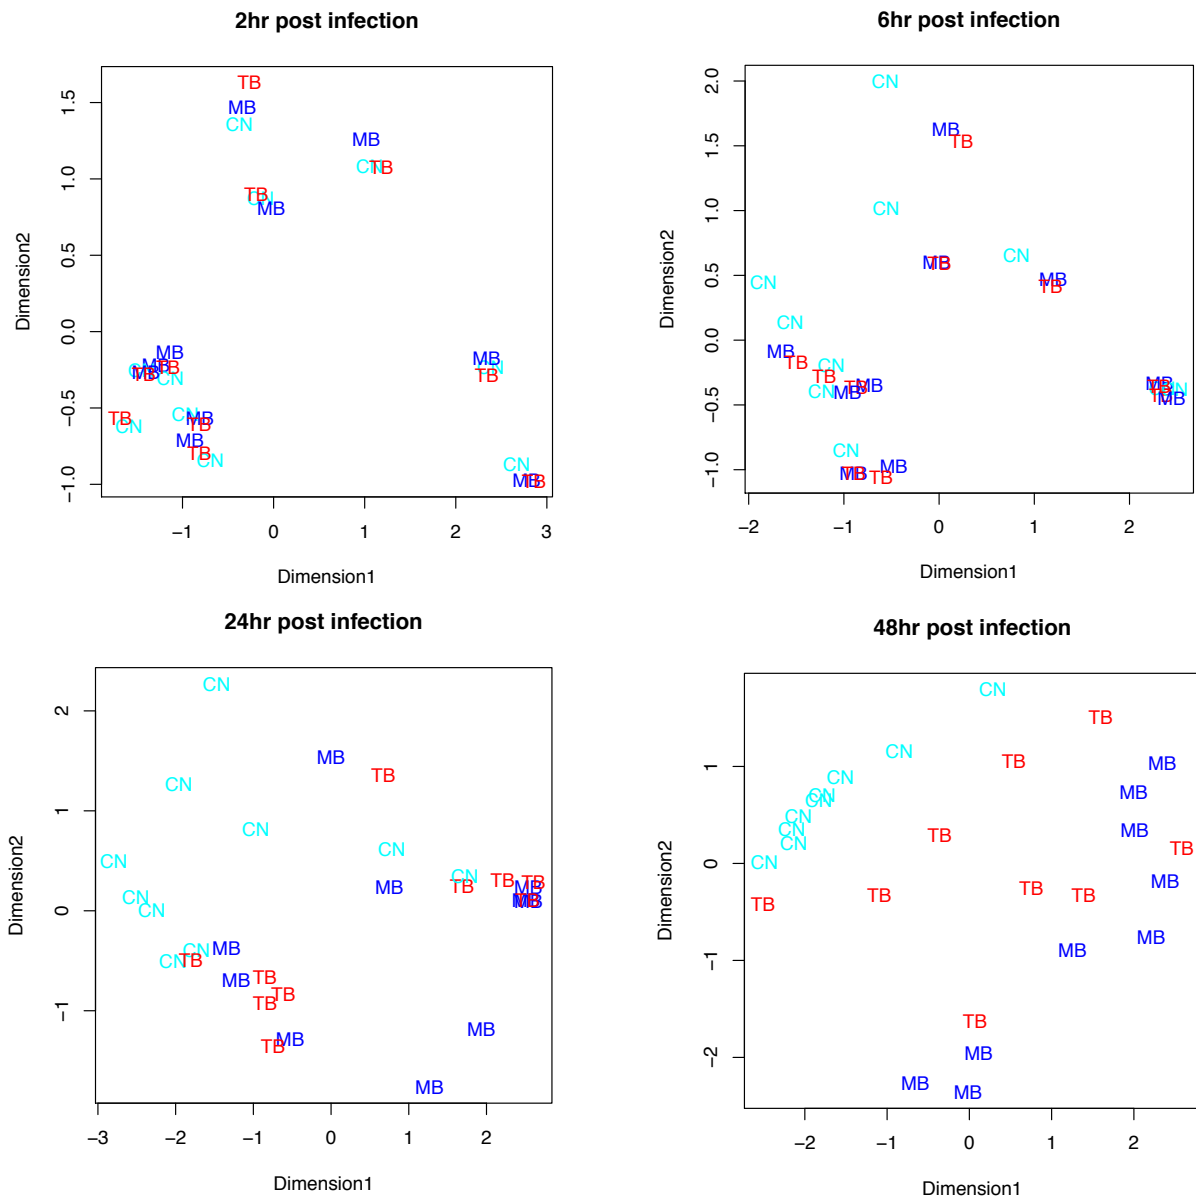

**Figure S5:** Multidimensional scaling plots of the RNA-seq expression data for individual of bovine alveolar macrophages infected with *M. bovis* ('MB', blue), *M. tuberculosis* ('TB', red) or none ('CN', cyan) at 2, 6, 24 ad 48 hours post-infection.

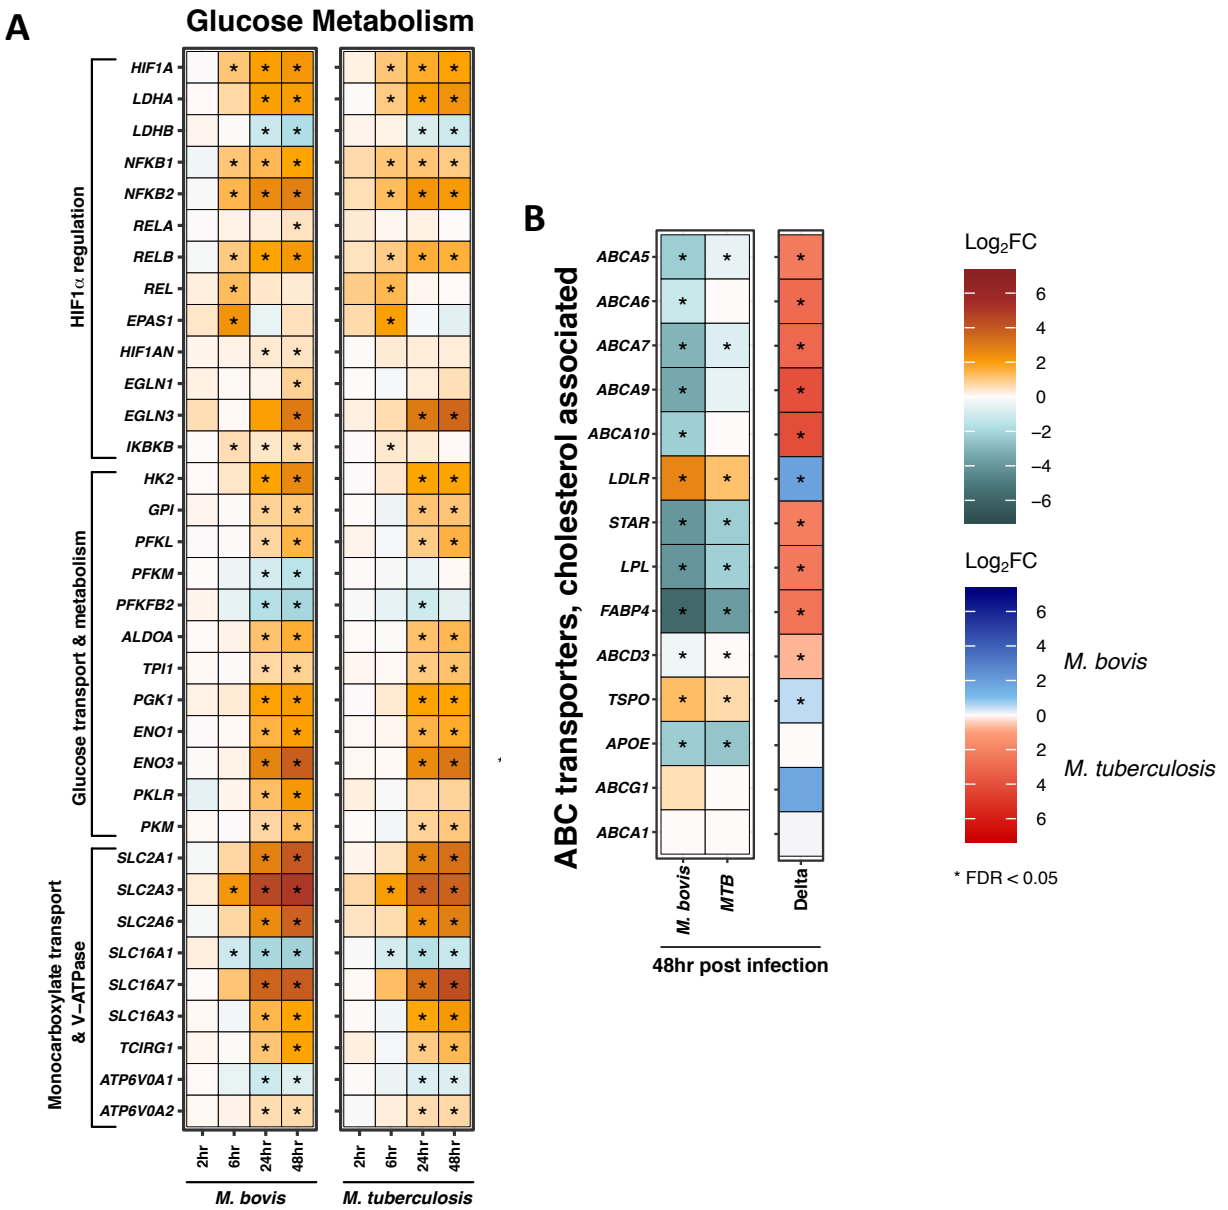

Source: http://biorxiv.org/content/10.1101/220624v1.full.pdf
